# Supplementary material
Source: PubMed Central journal article supplement (PMC9691607)
Supplement: NIHMS1848825-supplement-SI.pdf [file NIHMS1848825-supplement-SI.pdf]

## Supporting Information

### Development of fluorinated peptoid-based histone deacetylase (HDAC) inhibitors for therapy-resistant acute leukemia

*Nina Reßing,<sup>‡1,2</sup> Julian Schliehe-Diecks,<sup>‡3</sup> Paris R. Watson<sup>4</sup>, Melf Sönnichsen<sup>3</sup>, Abigail D.*

*Cragin<sup>4</sup>, Andrea Schöler,<sup>2</sup> Jing Yang,<sup>3,5</sup> Linda Schäker-Hübner,<sup>1</sup> Arndt Borkhardt,<sup>3</sup> David W.*

*Christianson<sup>4</sup>, Sanil Bhatia,<sup>\*3</sup> and Finn K. Hansen<sup>\*1</sup>*

<sup>1</sup>Pharmaceutical Institute, Pharmaceutical and Cell Biological Chemistry, University of Bonn, An der Immenburg 4, 53121 Bonn, Germany.

<sup>2</sup>Institute for Drug Discovery, Medical Faculty, Leipzig University, Brüderstraße 34, 04103 Leipzig, Germany.

<sup>3</sup>Department of Pediatric Oncology, Hematology and Clinical Immunology, Medical Faculty, Heinrich Heine University Düsseldorf, Moorenstr. 5, 40225 Düsseldorf, Germany.

<sup>4</sup>Roy and Diana Vagelos Laboratories, Department of Chemistry, University of Pennsylvania, 231 South 34th Street, Philadelphia, Pennsylvania 19104-6323, United States

<sup>5</sup>Department of Medicine, Yangzhou Polytechnic College, West Wenchang Road 458, Yangzhou, 225009, P.R. China

<sup>‡</sup> These authors contributed equally to this work.

Corresponding authors:

Sanil Bhatia, Tel. +49-211-81-04896, E-Mail: sanil.bhatia@uni-duesseldorf.de

Finn K. Hansen, Tel. +49-228-73-5213, E-Mail: finn.hansen@uni-bonn.de

## Contents

|                                                       |     |
|-------------------------------------------------------|-----|
| 1. Supplementary Tables.....                          | S3  |
| 2. $^1\text{H}$ and $^{13}\text{C}$ NMR spectra ..... | S5  |
| 3. HPLC chromatograms.....                            | S21 |

## 1. Supplementary Tables

**Table S1.** Effect on cellular viability (IC50 values in nM) upon **10h**, **10p**, CI994 or ricolinostat exposure against selected leukemia cells and two healthy fibroblast control cells.

| Cell line            | 10h            | 10p              | CI994            | Ricolinostat     |
|----------------------|----------------|------------------|------------------|------------------|
| REH                  | 203.2 ± 17.3   | >25000           | 3170.7 ± 158.9   | 1073.9 ± 57.6    |
| HAL01                | 1206.3 ± 333.3 | >25000           | 2140 ± 669.8     | 601.8 ± 12       |
| 697                  | 227.7 ± 3.6    | 10995 ± 1887.1   | 2450.7 ± 238.5   | 1563 ± 38.8      |
| PEER                 | 175.3 ± 22     | >25000           | 2605.3 ± 186.7   | 1036.4 ± 94.4    |
| SUPB15               | 291.9 ± 50.6   | 13000.3 ± 1237.6 | 3382.3 ± 1046.6  | 1637 ± 232.6     |
| KASUMI               | 175.3 ± 8.4    | >25000           | 2553 ± 87.7      | 1779 ± 142.4     |
| DND41                | 565 ± 23.6     | >25000           | 7970 ± 563.2     | 3370.7 ± 6.1     |
| Healthy Fibroblast 1 | 5979 ± 339.7   | >25000           | >25000           | >25000           |
| Healthy Fibroblast 2 | 3134.3 ± 135.9 | >25000           | >25000           | 16524.7 ± 1812.6 |
| HL60                 | 228.6 ± 37.8   | >25000           | 1076.4 ± 302.2   | 1008.8 ± 248.6   |
| MV4-11               | 258.8 ± 14.4   | >25000           | 1366.5 ± 1055.7  | 2450.3 ± 166.2   |
| K562                 | 820.2 ± 791    | 24342 ± 930.6    | 14985.3 ± 4805.4 | 19299.3 ± 662.5  |
| JURKAT               | 357.6 ± 91.2   | >25000           | 4928.3 ± 125     | 3344 ± 233.2     |
| MOLM13               | 94.7 ± 30.9    | >25000           | 1690.3 ± 241.6   | 2413.7 ± 444     |

**Table S2.** Data collection and refinement statistics.

|                                                   | HDAC6-10h complex <sup>a</sup>  |
|---------------------------------------------------|---------------------------------|
| Space group                                       | <i>P2</i> <sub>1</sub>          |
| a,b,c (Å)                                         | 78.34, 95.13, 98.14             |
| α, β, γ (°)                                       | 90.0, 98.73, 90.0               |
| R <sub>merge</sub> <sup>b</sup>                   | 0.141 (0.416)                   |
| R <sub>pim</sub> <sup>c</sup>                     | 0.104 (0.298)                   |
| CC <sub>1/2</sub> <sup>d</sup>                    | 0.980 (0.720)                   |
| Redundancy                                        | 1.7 (1.7)                       |
| Completeness (%)                                  | 97.9 (97.7)                     |
| I/σ                                               | 5.4 (2.0)                       |
| Refinement                                        |                                 |
| Resolution (Å)                                    | 48.5 - 1.85 (1.916 - 1.85)      |
| No. reflections                                   | 205228 (19929)                  |
| R <sub>work</sub> /R <sub>free</sub> <sup>e</sup> | 0.172/ 0.215<br>( 0.218/ 0.278) |
| Number of Atoms <sup>f</sup>                      |                                 |
| Protein                                           | 11158                           |
| Ligand                                            | 228                             |
| Solvent                                           | 1047                            |
| Average B factors (Å <sup>2</sup> )               |                                 |
| Protein                                           | 12                              |
| Ligand                                            | 15                              |
| Solvent                                           | 18                              |
| RMS Deviations                                    |                                 |
| Bond lengths (Å)                                  | 0.007                           |
| Bond angles (°)                                   | 1.3                             |
| Ramachandran Plot <sup>g</sup>                    |                                 |
| Favored                                           | 97.00                           |
| Allowed                                           | 3.00                            |
| Outliers                                          | 0.00                            |

<sup>a</sup>Values in parentheses refer to the highest-resolution shell indicated. <sup>b</sup> $R_{\text{merge}} = \frac{\sum_{hkl} \sum_i |I_{i,hkl} - \langle I \rangle_{hkl}|}{\sum_{hkl} \sum_i I_{i,hkl}}$ , where  $\langle I \rangle_{hkl}$  is the average intensity calculated for reflection *hkl* from replicate measurements. <sup>c</sup> $R_{\text{p.i.m.}} = \frac{(\sum_{hkl} (1/(N-1))^{1/2} \sum_i |I_{i,hkl} - \langle I \rangle_{hkl}|)}{\sum_{hkl} \sum_i I_{i,hkl}}$ , where  $\langle I \rangle_{hkl}$  is the average intensity calculated for reflection *hkl* from replicate measurements and N is the number of reflections. <sup>d</sup>Pearson correlation coefficient between random half-datasets. <sup>e</sup> $R_{\text{work}} = \frac{\sum ||F_o| - |F_c||}{\sum |F_o|}$  for reflections contained in the working set.  $|F_o|$  and  $|F_c|$  are the observed and calculated structure factor amplitudes, respectively.  $R_{\text{free}}$  is calculated using the same expression for reflections contained in the test set held aside during refinement. <sup>f</sup>Per asymmetric unit. <sup>g</sup>Calculated with MolProbity.

## 2. $^1\text{H}$ and $^{13}\text{C}$ NMR spectra

4-({*N*-[(cyclohexylcarbamoyl)methyl]-1-(3,5-dimethylphenyl)formamido}methyl)-3-fluoro-*N*-hydroxybenzamide (**10a**)

$^1\text{H}$  NMR (400 MHz,  $\text{DMSO-}d_6$ , 20 °C)

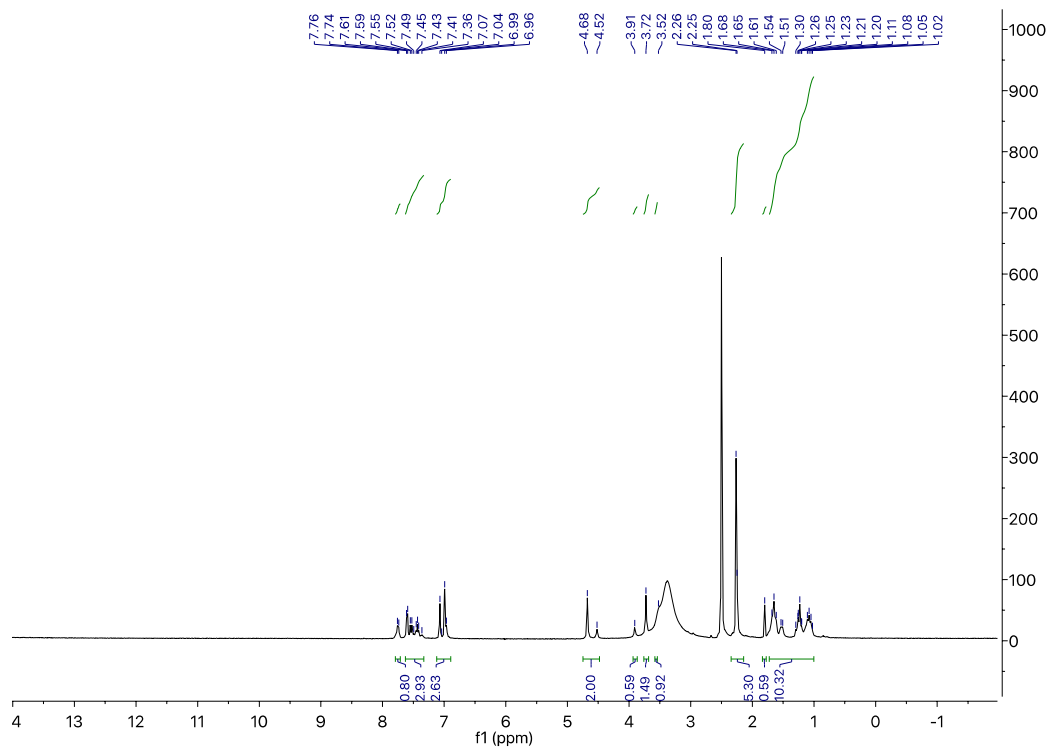

$^{13}\text{C}$  NMR (101 MHz,  $\text{DMSO-}d_6$ )

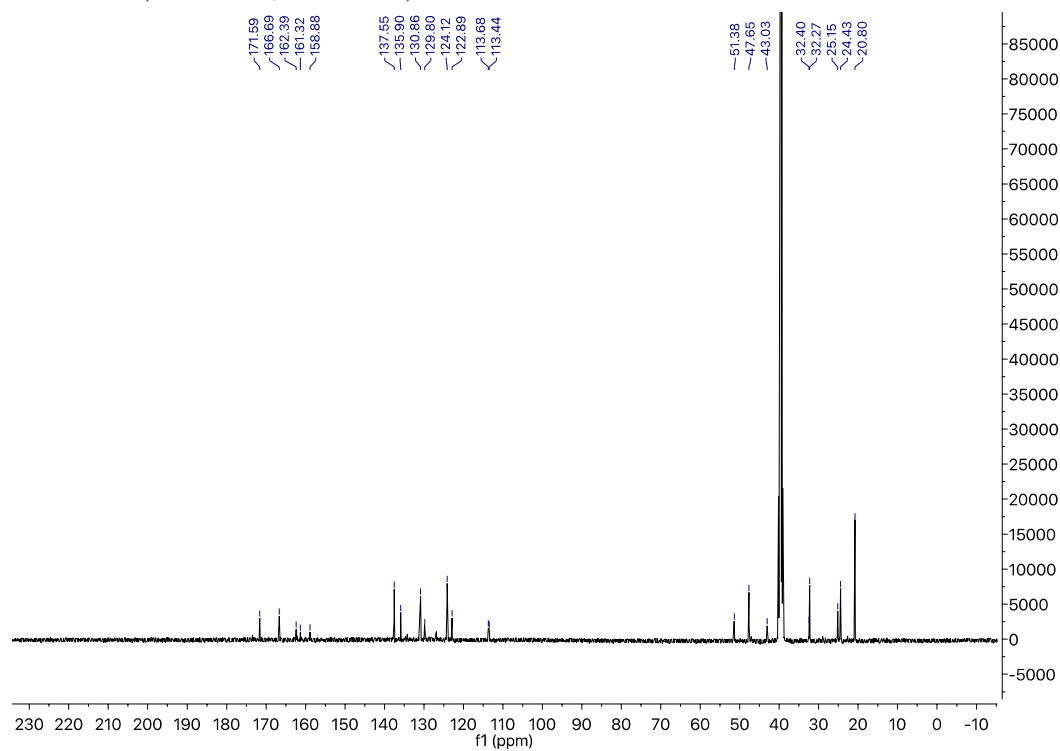

4-({*N*-[(cyclohexylcarbamoyl)methyl]-1-[4-(dimethylamino)phenyl]formamido}methyl)-3-fluoro-*N*-hydroxybenzamide (**10b**)

$^1\text{H}$  NMR (400 MHz,  $\text{DMSO-}d_6$ , 20 °C)

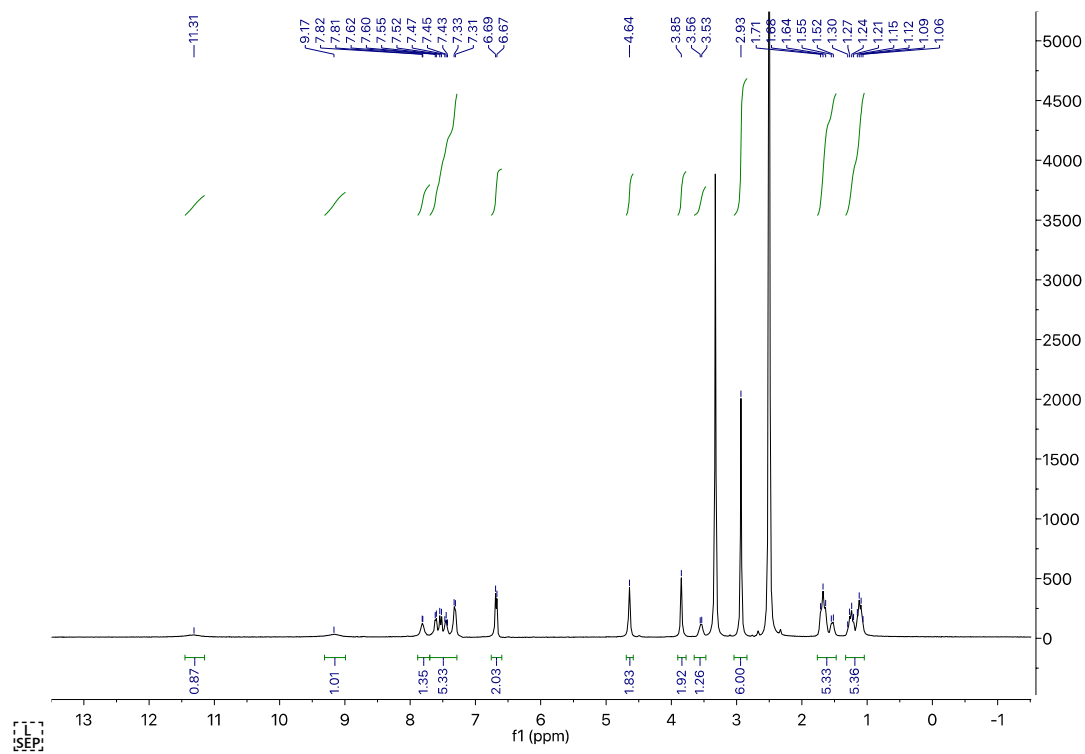

$^{13}\text{C}$  NMR (101 MHz,  $\text{DMSO-}d_6$ )

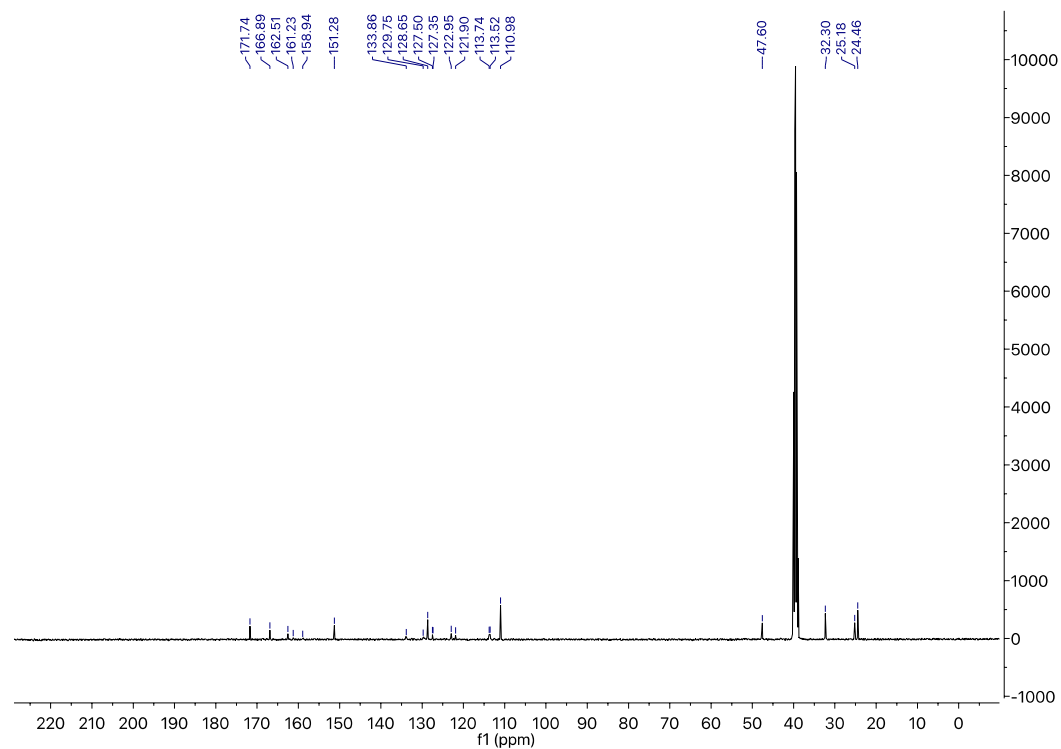

4-({*N*-[(cyclohexylcarbamoyl)methyl]-1-(2-fluorophenyl)formamido}methyl)-3-fluoro-*N*-hydroxybenzamide (**10c**)

$^1\text{H}$  NMR (300 MHz,  $\text{DMSO-}d_6$ , 20°C)

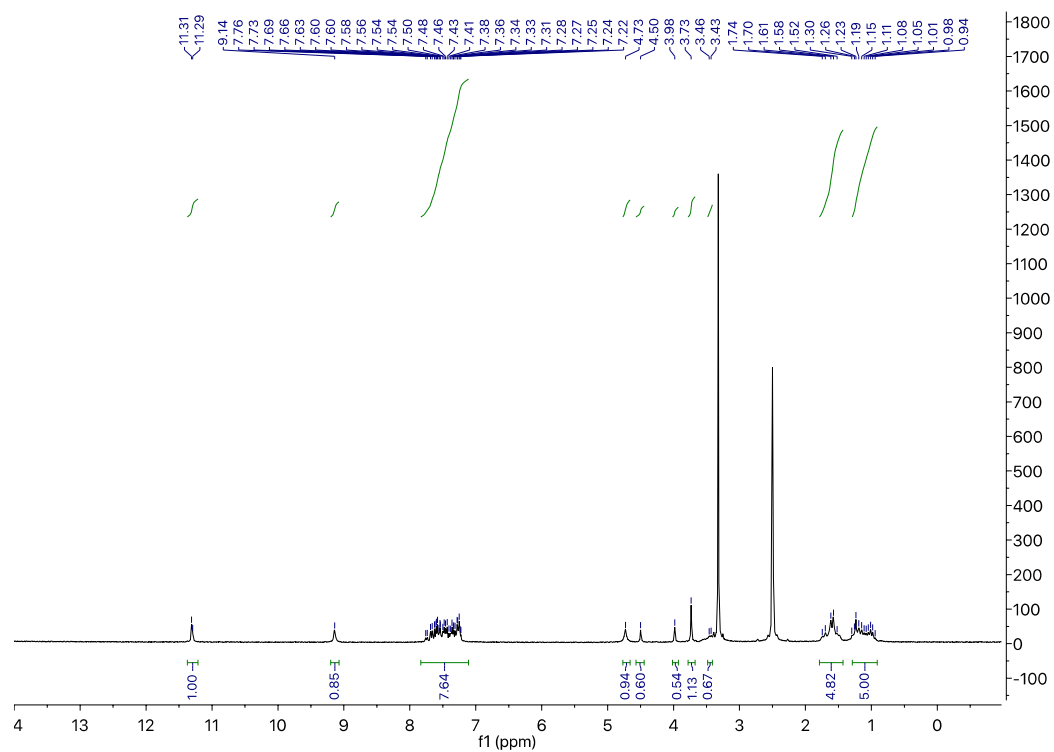

$^{13}\text{C}$  NMR (101 MHz,  $\text{DMSO-}d_6$ )

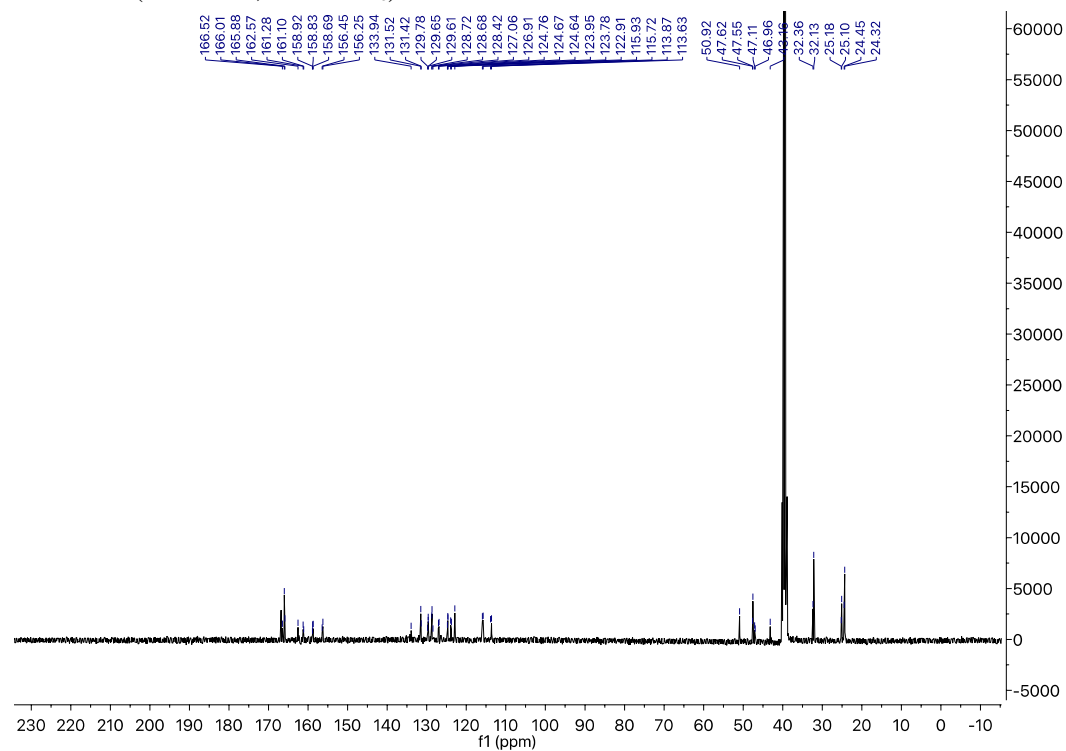

4-({*N*-[(cyclohexylcarbamoyl)methyl]-1-(2-methylphenyl)formamido }methyl)-3-fluoro-*N*-hydroxybenzamide (**10d**)

$^1\text{H NMR}$  (400 MHz,  $\text{DMSO-}d_6$ , 60 °C)

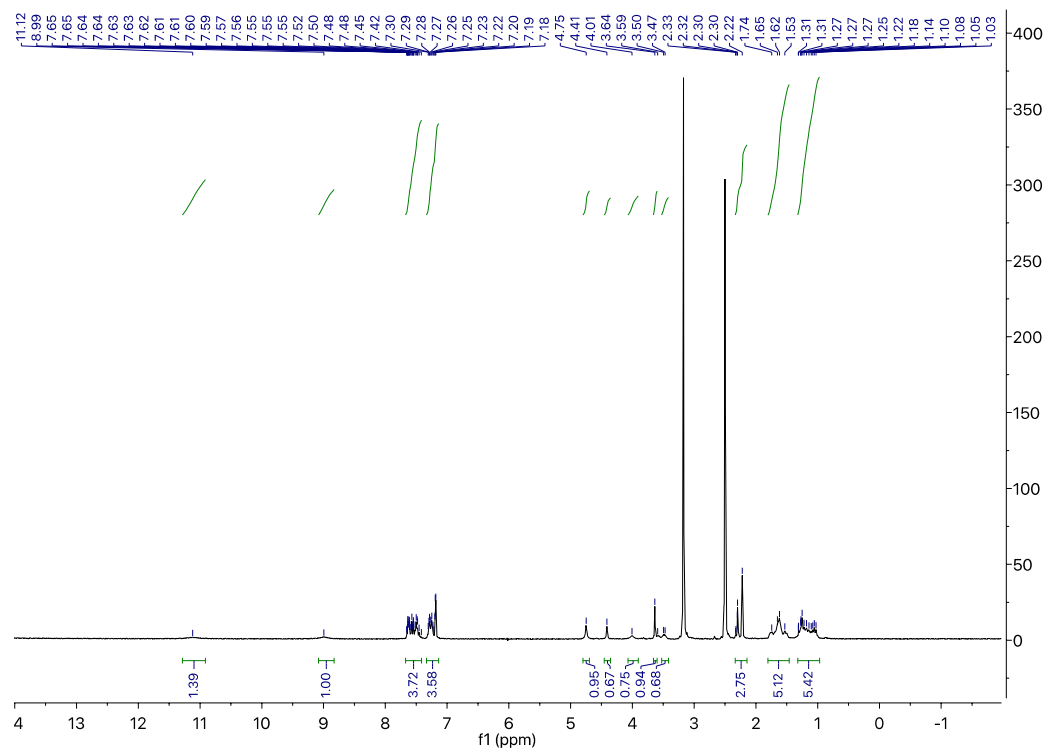

$^{13}\text{C NMR}$  (75 MHz,  $\text{DMSO-}d_6$ )

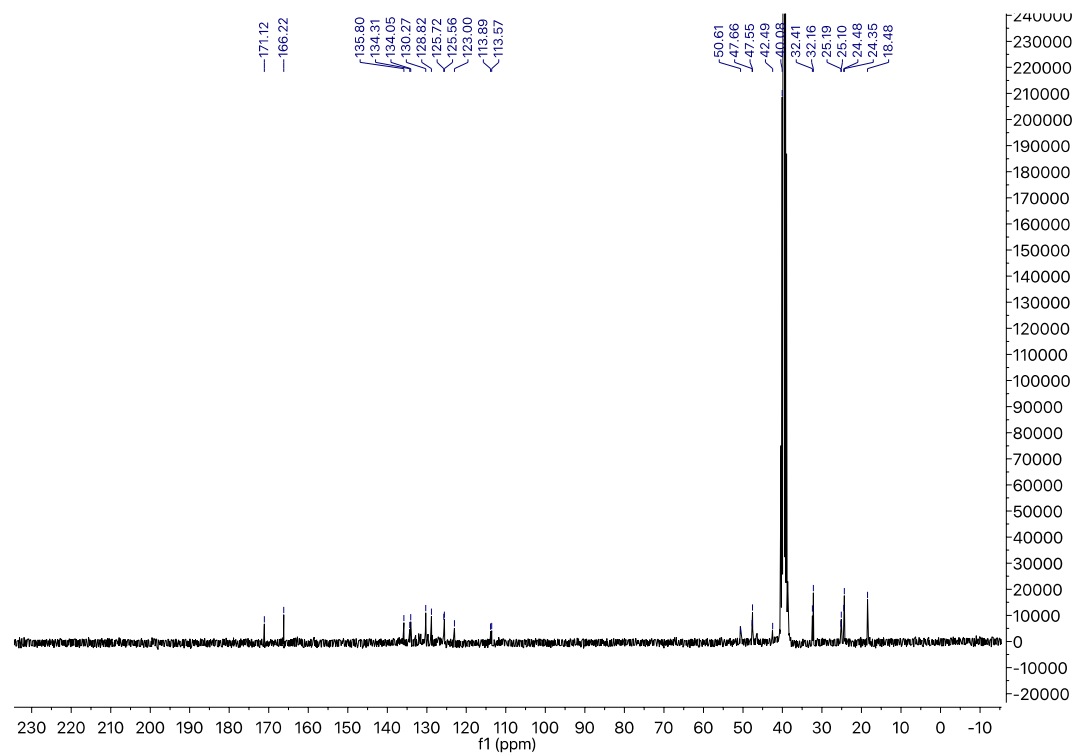



4-({*N*-[(cyclohexylcarbamoyl)methyl]-1-(2-methoxyphenyl)formamido }methyl)-3-fluoro-*N*-hydroxybenzamide (**10e**)

$^1\text{H}$  NMR (400 MHz,  $\text{DMSO-}d_6$ , 20 °C)

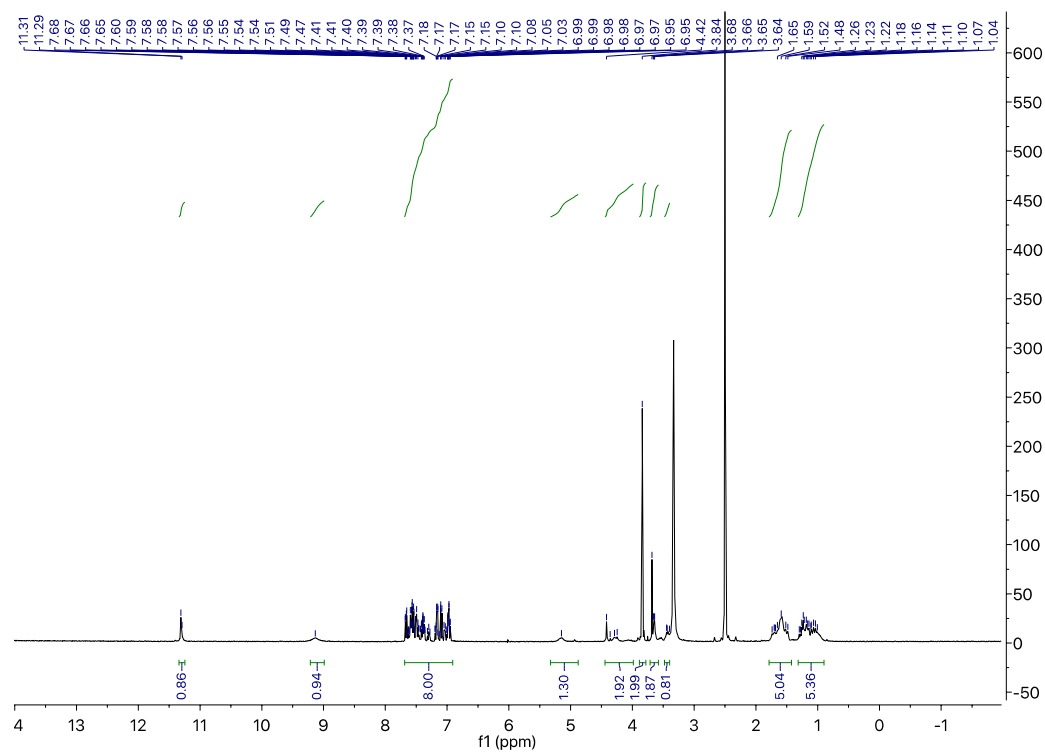

$^{13}\text{C}$  NMR (75 MHz,  $\text{DMSO-}d_6$ )

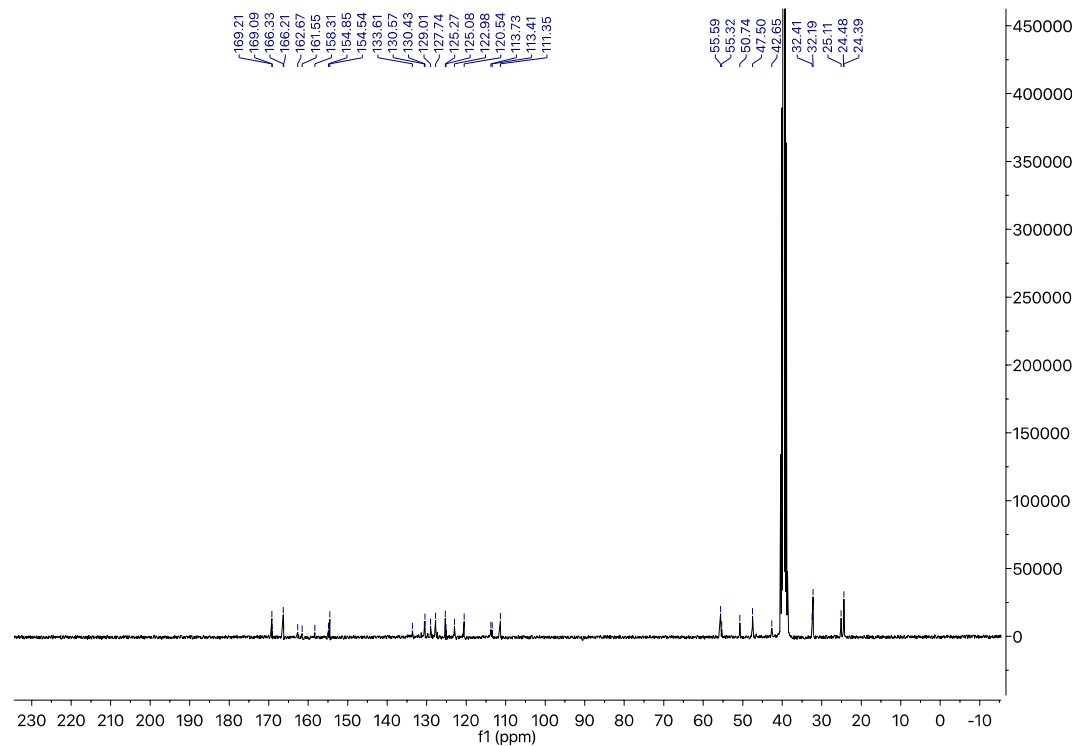

4-({*N*-[(cyclohexylcarbamoyl)methyl]-1-[2-(trifluoromethyl)phenyl]formamido }methyl)-3-fluoro-*N*-hydroxybenzamide (**10f**)

$^1\text{H}$  NMR (400 MHz,  $\text{DMSO-}d_6$ , 20 °C)

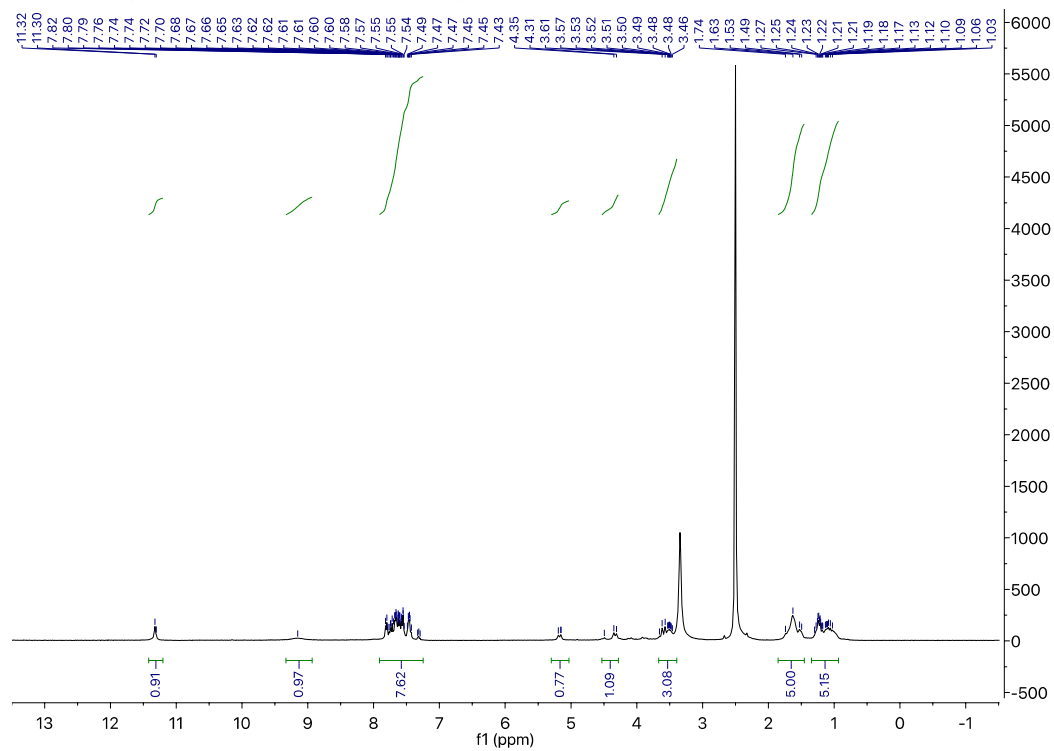

$^{13}\text{C}$  NMR (101 MHz,  $\text{DMSO-}d_6$ )

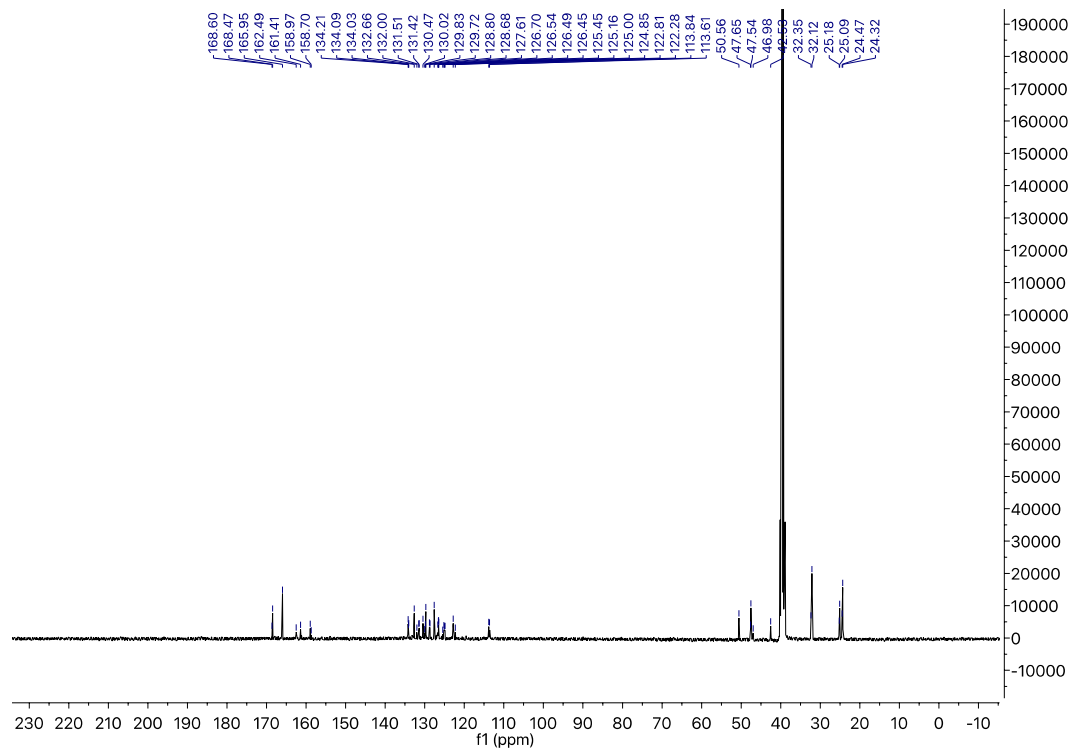

4-({*N*-[(benzylcarbamoyl)methyl]-1-(3,5-dimethylphenyl)formamido}methyl)-3-fluoro-*N*-hydroxybenzamide (**10g**)

$^1\text{H}$  NMR (300 MHz,  $\text{DMSO-}d_6$ , 20°C)

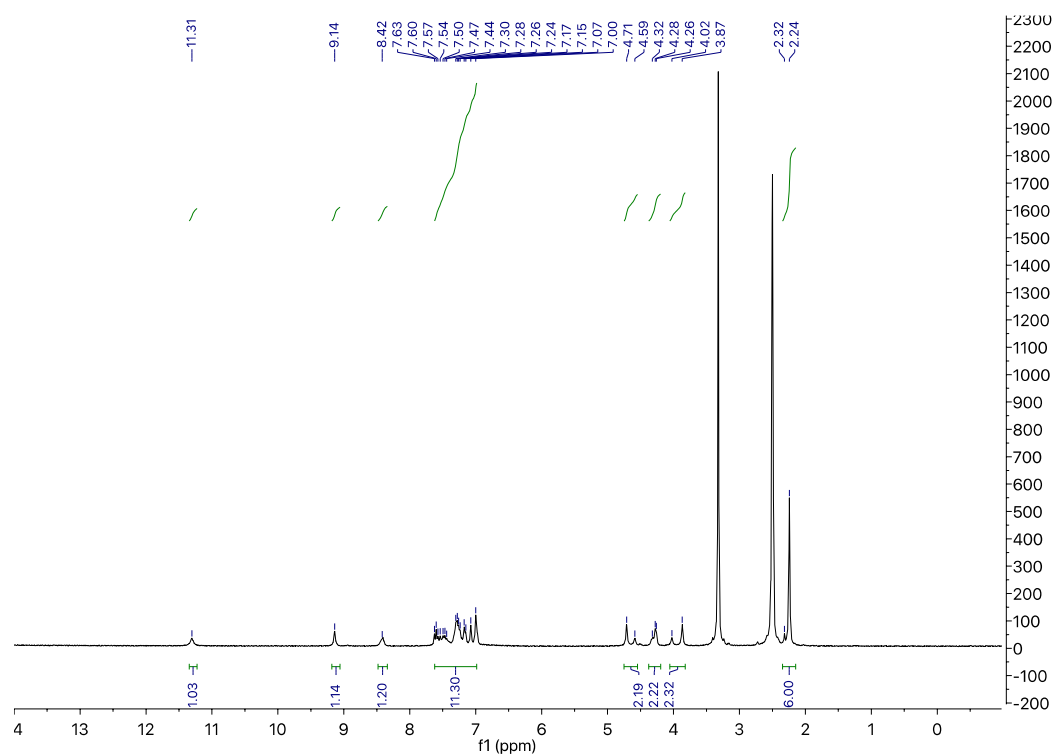

$^{13}\text{C}$  NMR (101 MHz,  $\text{DMSO-}d_6$ )

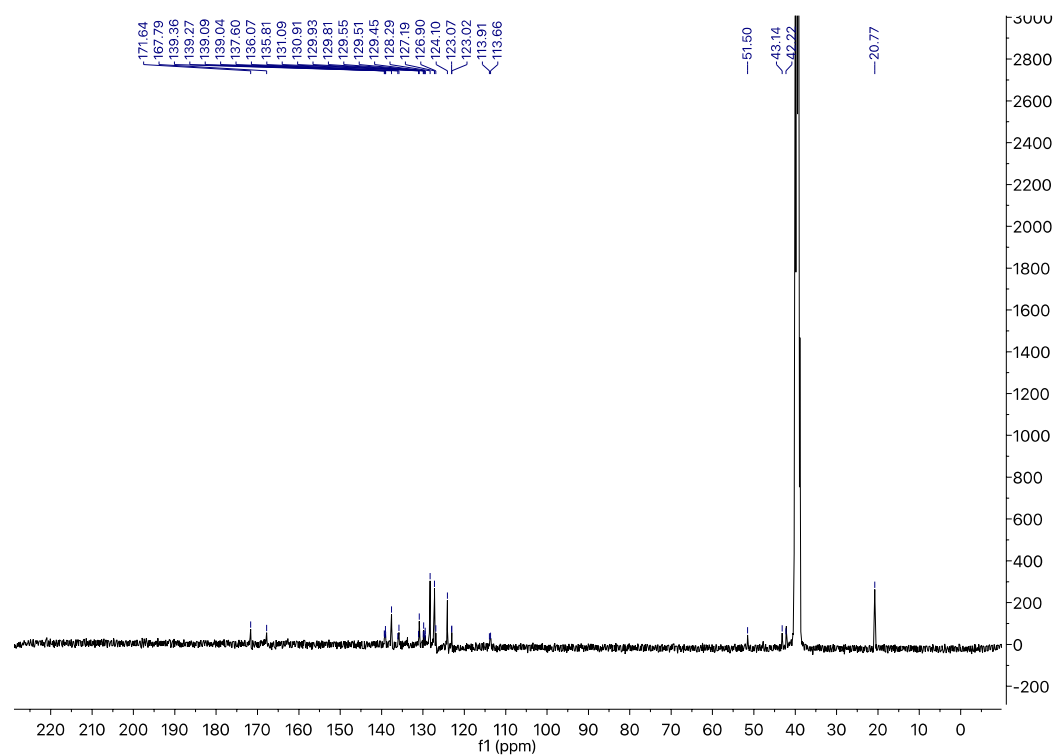

4-({*N*-[(benzylcarbamoyl)methyl]-1-[4-(dimethylamino)phenyl]formamido }methyl)-3-fluoro-*N*-hydroxybenzamide (**10h**)

$^1\text{H}$  NMR (400 MHz,  $\text{DMSO-}d_6$ , 20°C)

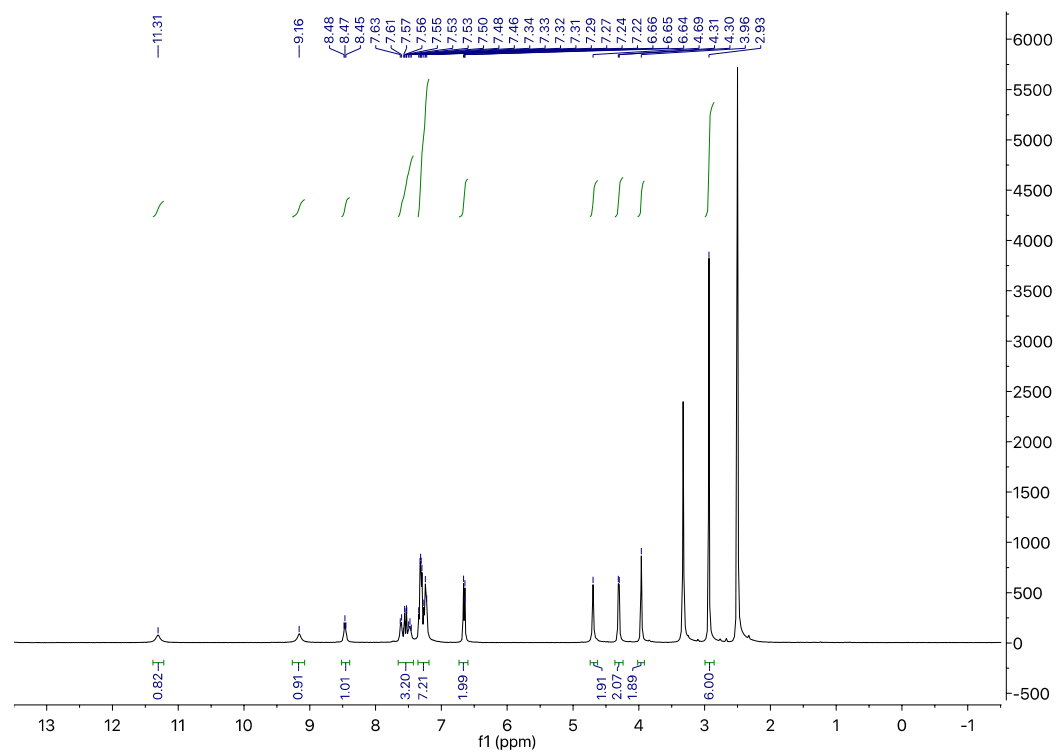

$^{13}\text{C}$  NMR (101 MHz,  $\text{DMSO-}d_6$ )

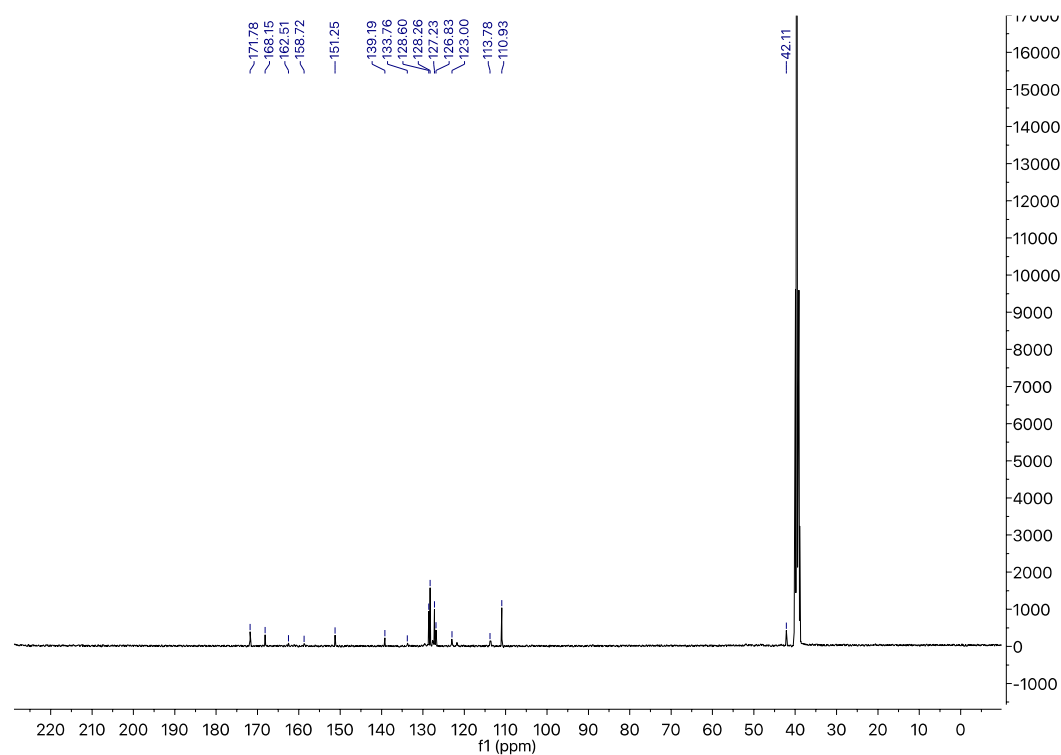

4-({*N*-[(*tert*-butylcarbamoyl)methyl]-1-(3,5-dimethylphenyl)formamido}methyl)-3-fluoro-*N*-hydroxybenzamide (**10i**)

$^1\text{H}$  NMR (400 MHz, DMSO- $d_6$ , 20°C)

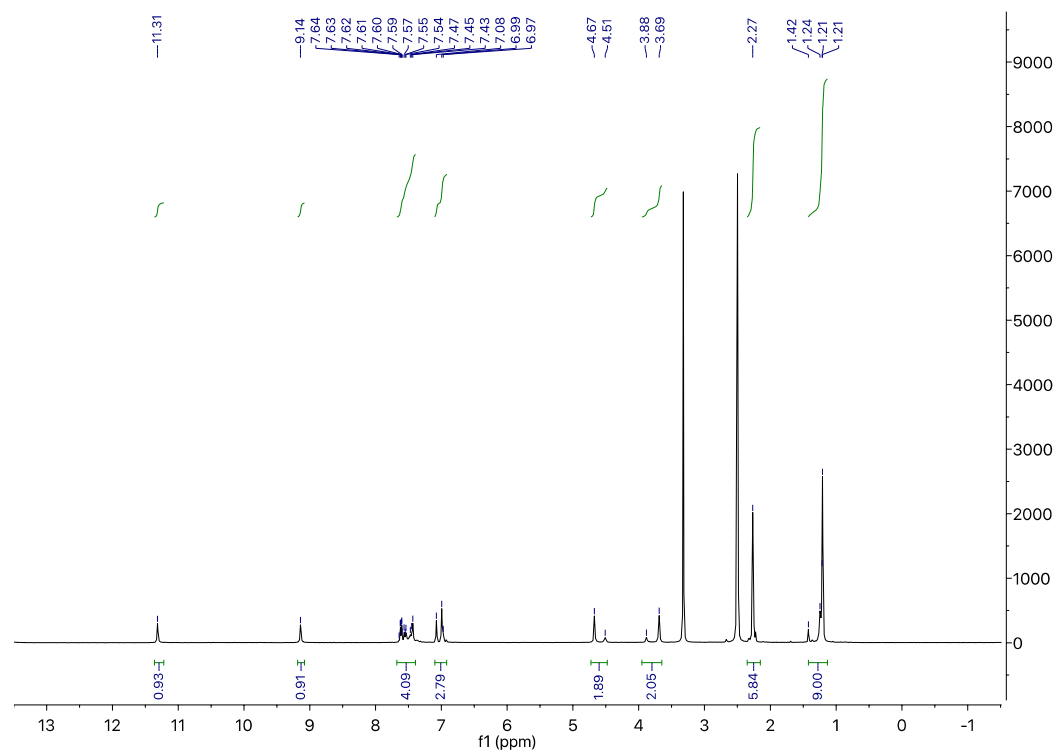

$^{13}\text{C}$  NMR (101 MHz, DMSO- $d_6$ )

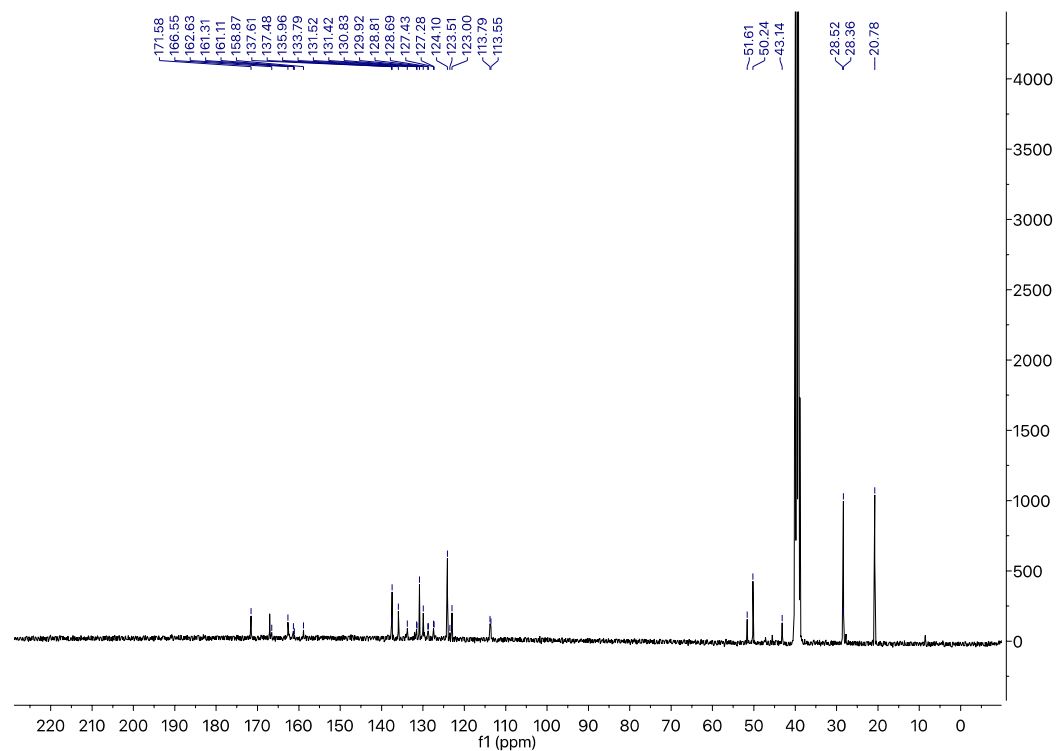

4-({*N*-[(*tert*-butylcarbamoyl)methyl]-1-[4-(dimethylamino)phenyl]formamido }methyl)-3-fluoro-*N*-hydroxybenzamide (**10j**)

<sup>1</sup>H NMR (400 MHz, DMSO-*d*<sub>6</sub>, 20°C)

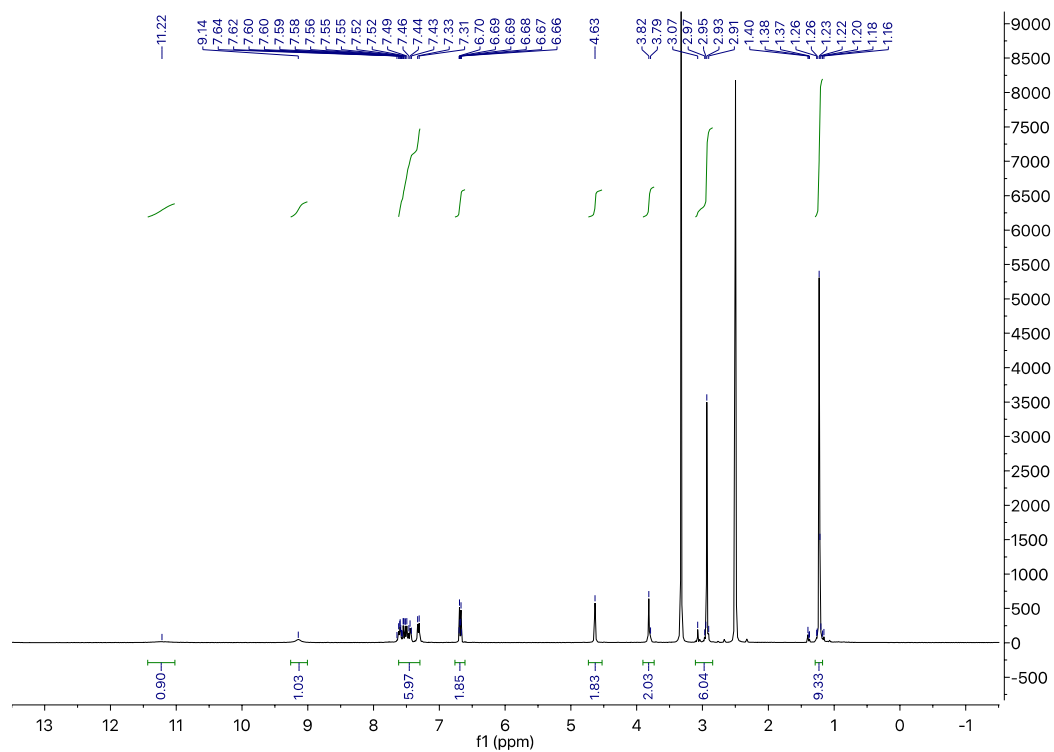

<sup>13</sup>C NMR (101 MHz, DMSO-*d*<sub>6</sub>)

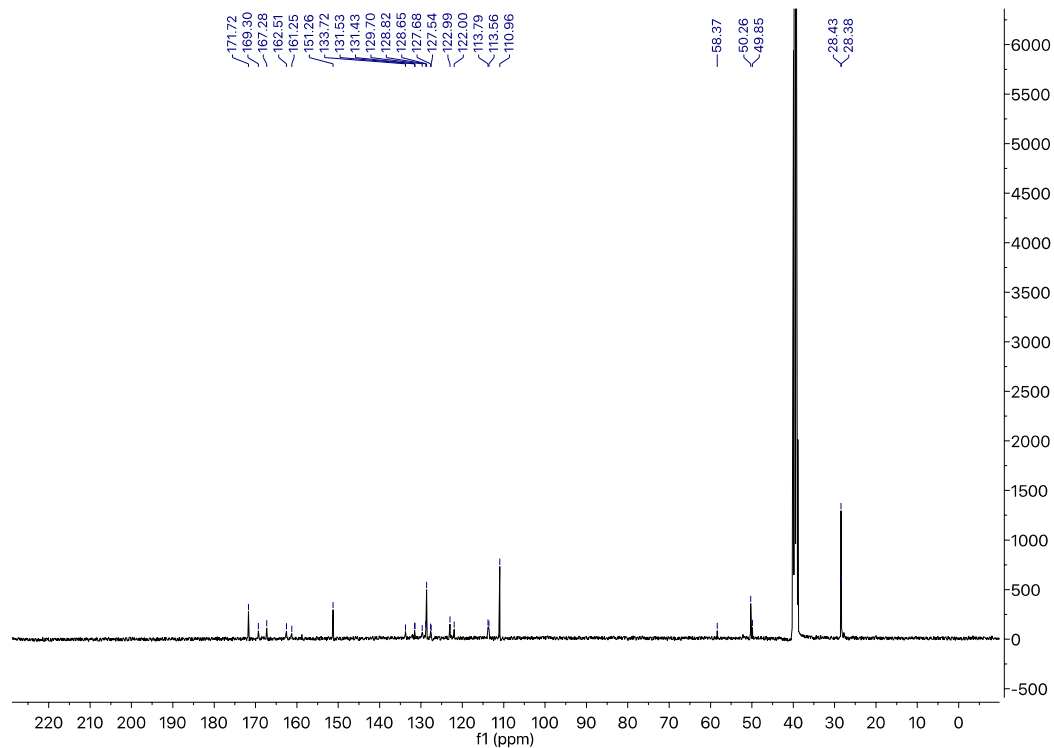

4-({*N*-[(*tert*-butylcarbamoyl)methyl]-1-(2-fluorophenyl)formamido}methyl)-3-fluoro-*N*-hydroxybenzamide (**10k**)

$^1\text{H}$  NMR (400 MHz,  $\text{DMSO-}d_6$ , 20 °C)

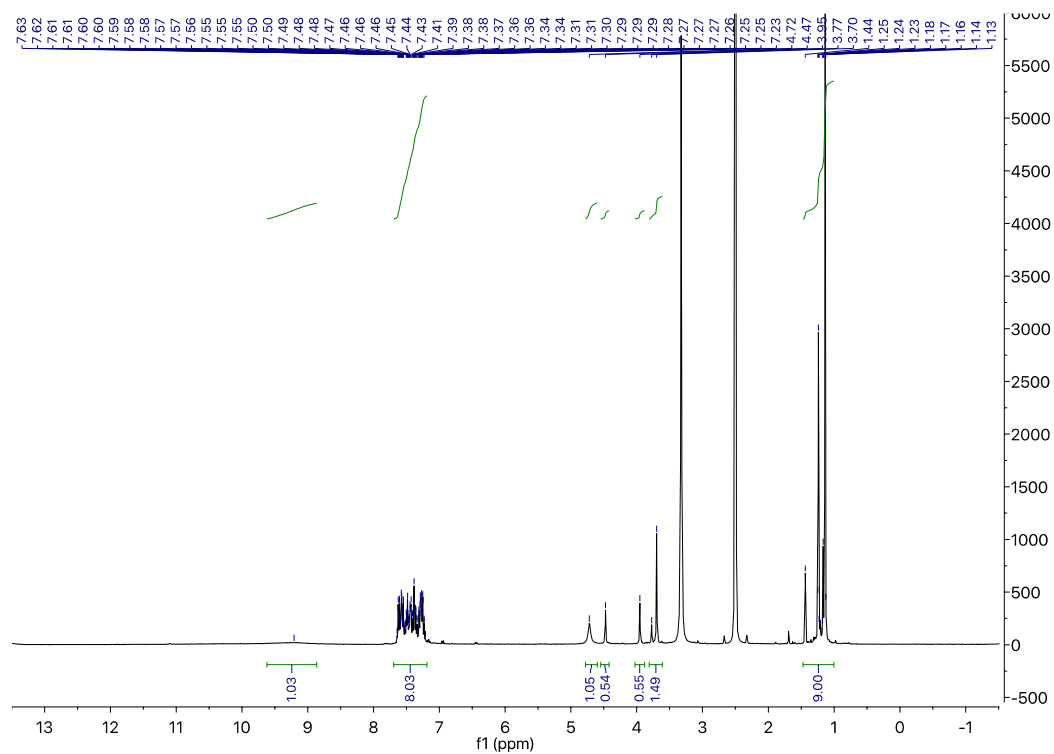

$^{13}\text{C}$  NMR (101 MHz,  $\text{DMSO-}d_6$ )

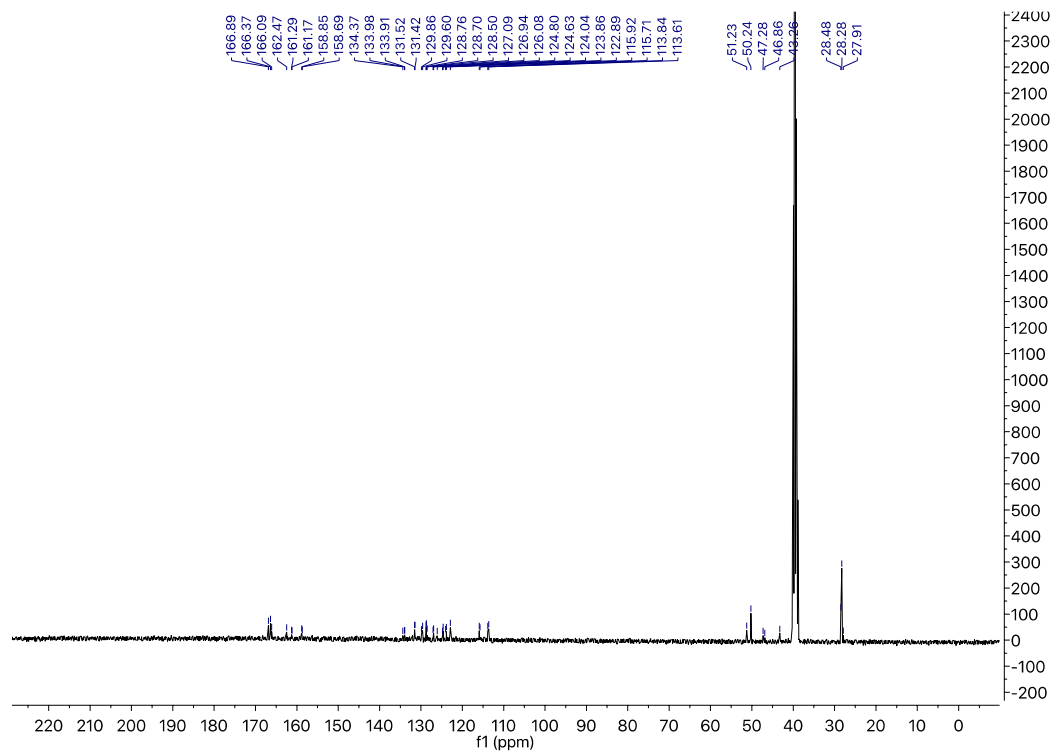

4-({*N*-[(*tert*-butylcarbamoyl)methyl]-1-(2-methylphenyl)formamido}methyl)-3-fluoro-*N*-hydroxybenzamide (**10**)

$^1\text{H}$  NMR (300 MHz,  $\text{DMSO-}d_6$ ,  $60^\circ\text{C}$ )

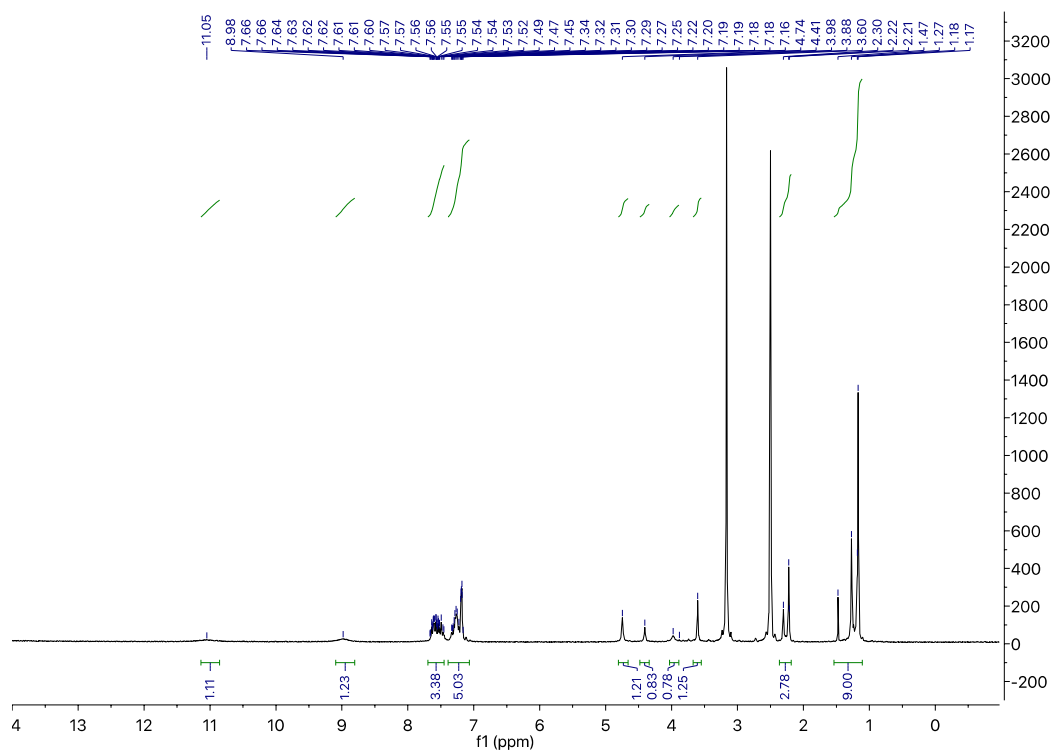

$^{13}\text{C}$  NMR (101 MHz,  $\text{DMSO-}d_6$ )

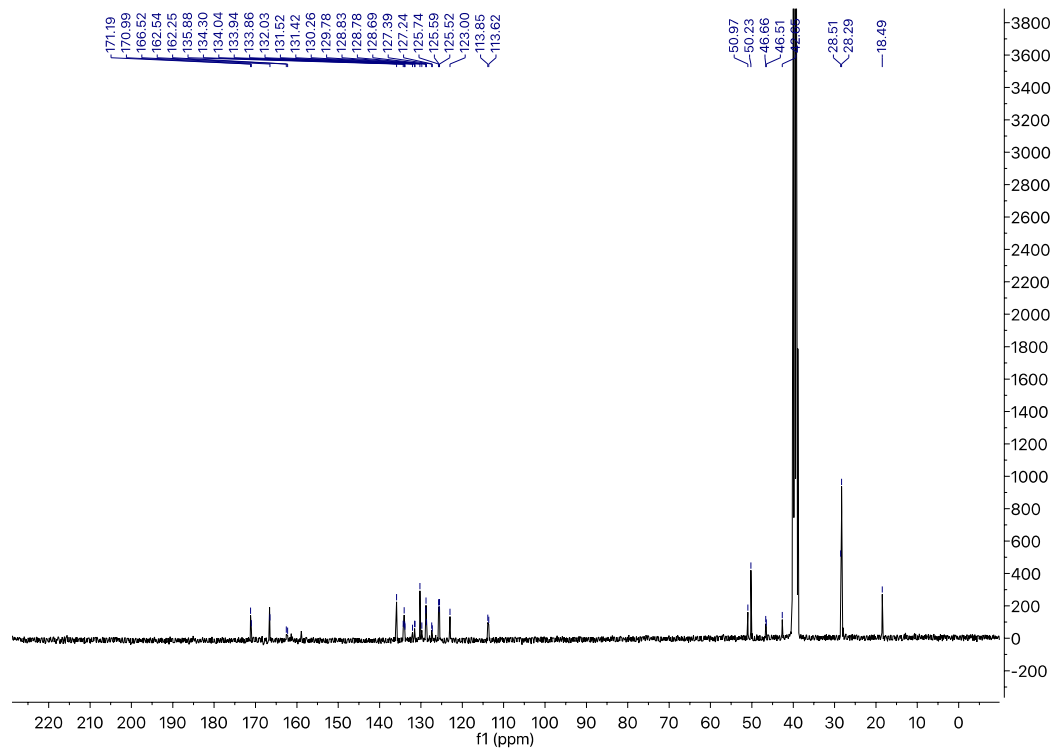



4-({*N*-[(*tert*-butylcarbamoyl)methyl]-1-(2-methoxyphenyl)formamido}methyl)-3-fluoro-*N*-hydroxybenzamide (**10m**)

$^1\text{H}$  NMR (300 MHz,  $\text{DMSO-}d_6$ , 60 °C)

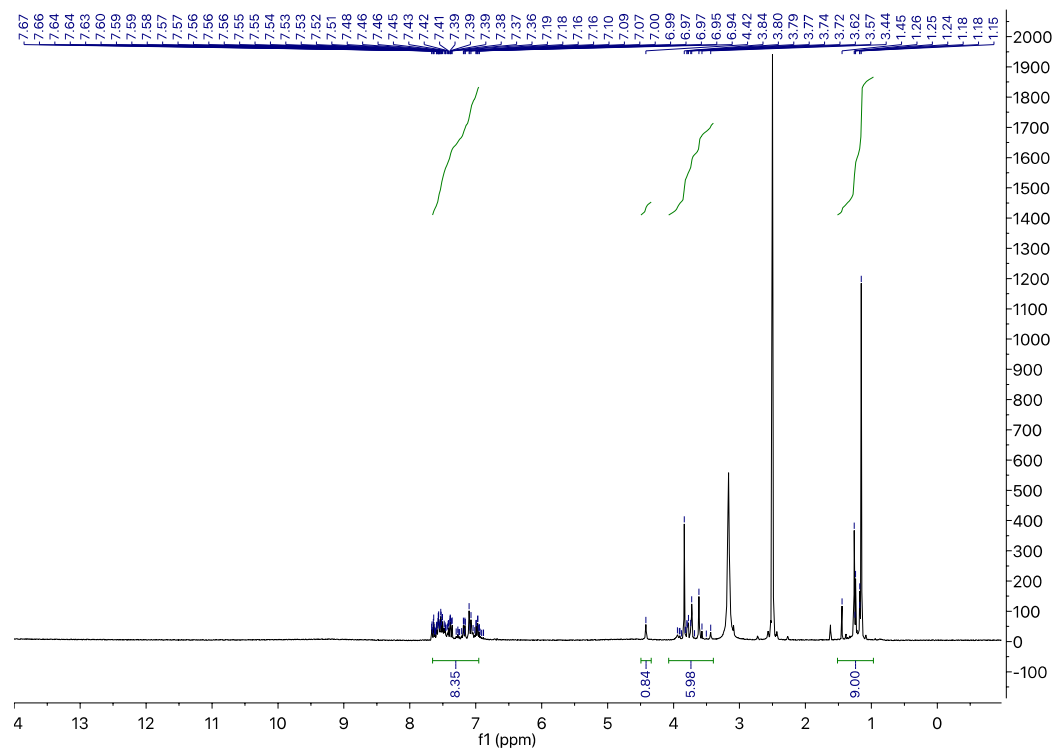

$^{13}\text{C}$  NMR (101 MHz,  $\text{DMSO-}d_6$ )

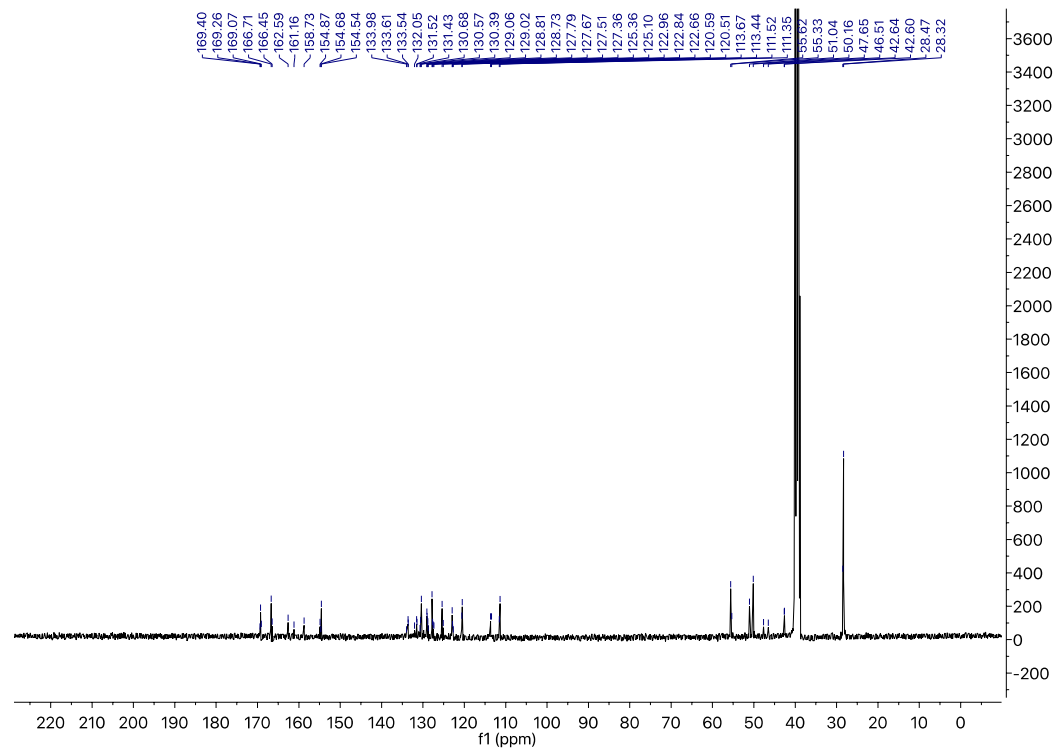

4-({*N*-[(*tert*-butylcarbamoyl)methyl]-1-[2-(trifluoromethyl)phenyl]formamido}methyl)-3-fluoro-*N*-hydroxybenzamide (**10n**)

$^1\text{H NMR}$  (300 MHz,  $\text{DMSO-}d_6$ , 60 °C)

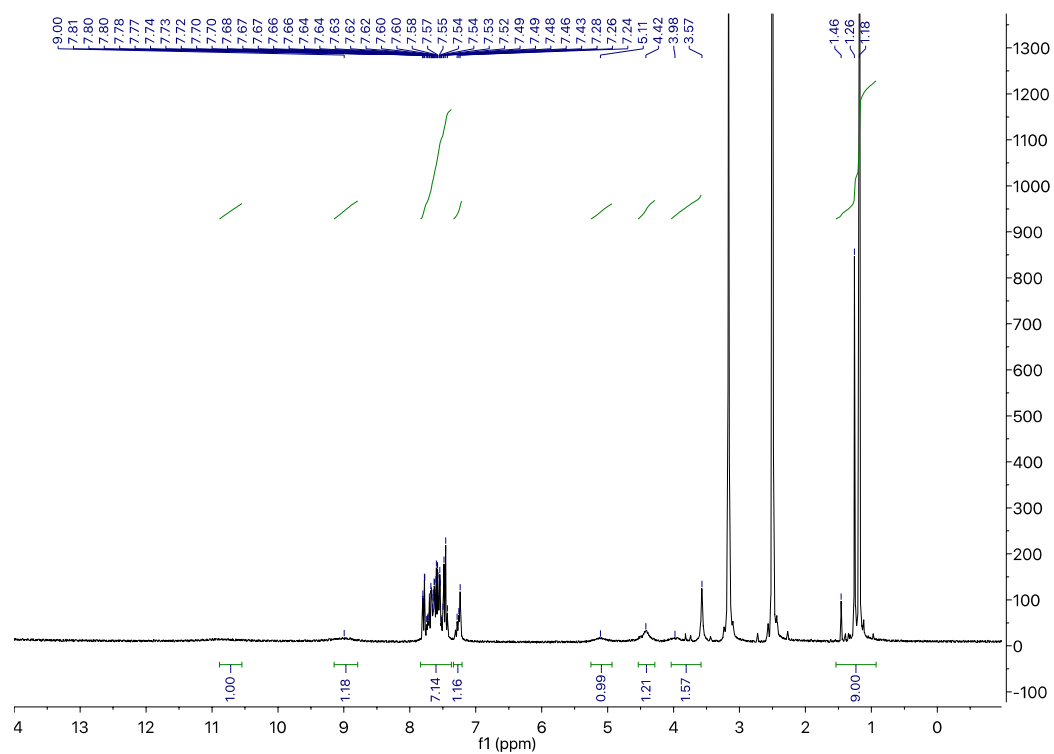

$^{13}\text{C NMR}$  (75 MHz,  $\text{DMSO-}d_6$ )

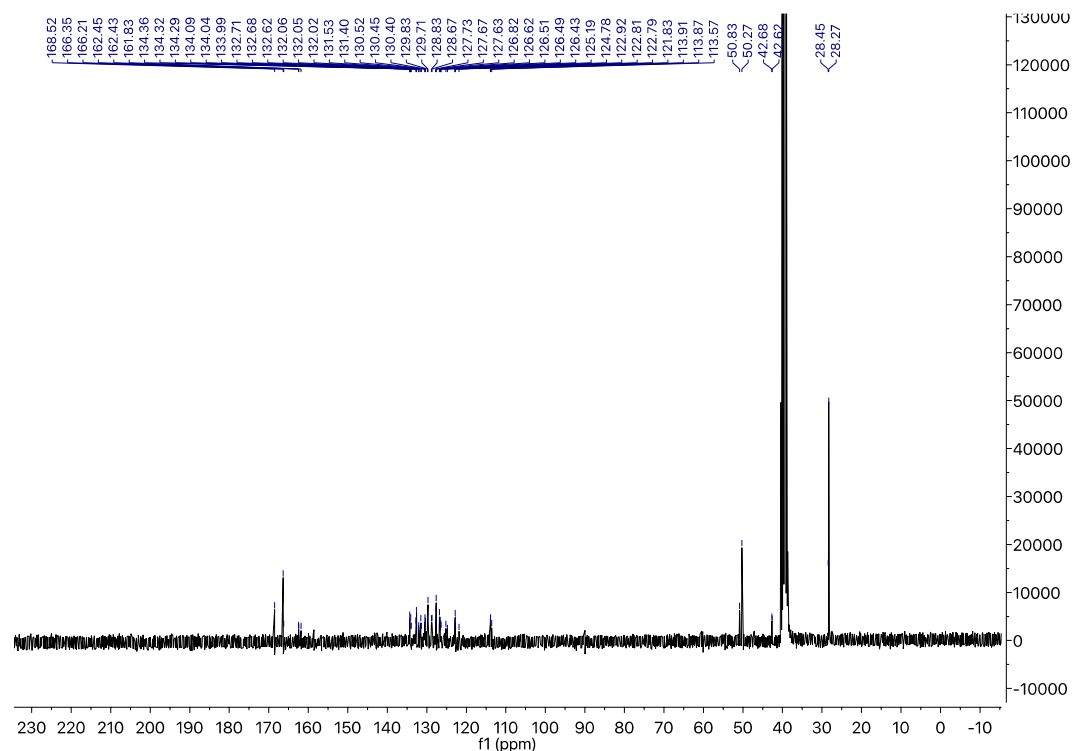

4-({*N*-[(*tert*-butylcarbamoyl)methyl]-1-(2-chlorophenyl)formamido }methyl)-3-fluoro-*N*-hydroxybenzamide (**10o**)

$^1\text{H NMR}$  (400 MHz,  $\text{DMSO-}d_6$ , 20 °C)

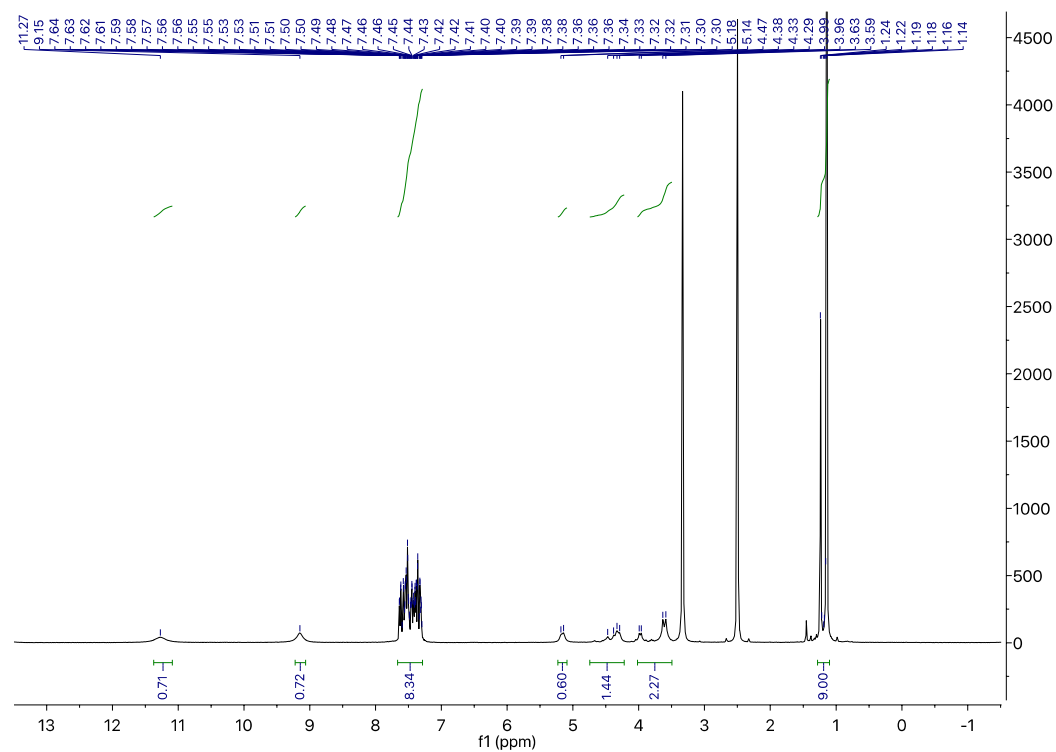

$^{13}\text{C NMR}$  (101 MHz,  $\text{DMSO-}d_6$ )

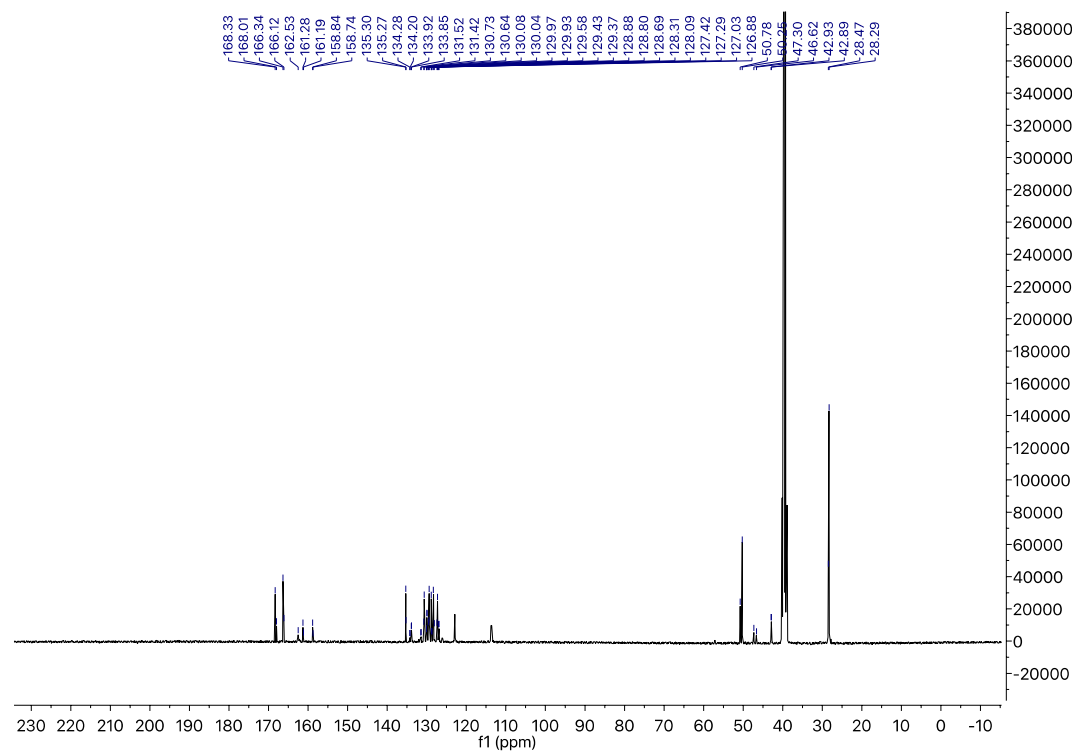

4-({*N*-[(*tert*-butylcarbamoyl)methyl]-1-[2-(propan-2-yl)phenyl]formamido }methyl)-3-fluoro-*N*-hydroxybenzamide (**10p**)

$^1\text{H}$  NMR (400 MHz,  $\text{DMSO-}d_6$ , 20 °C)

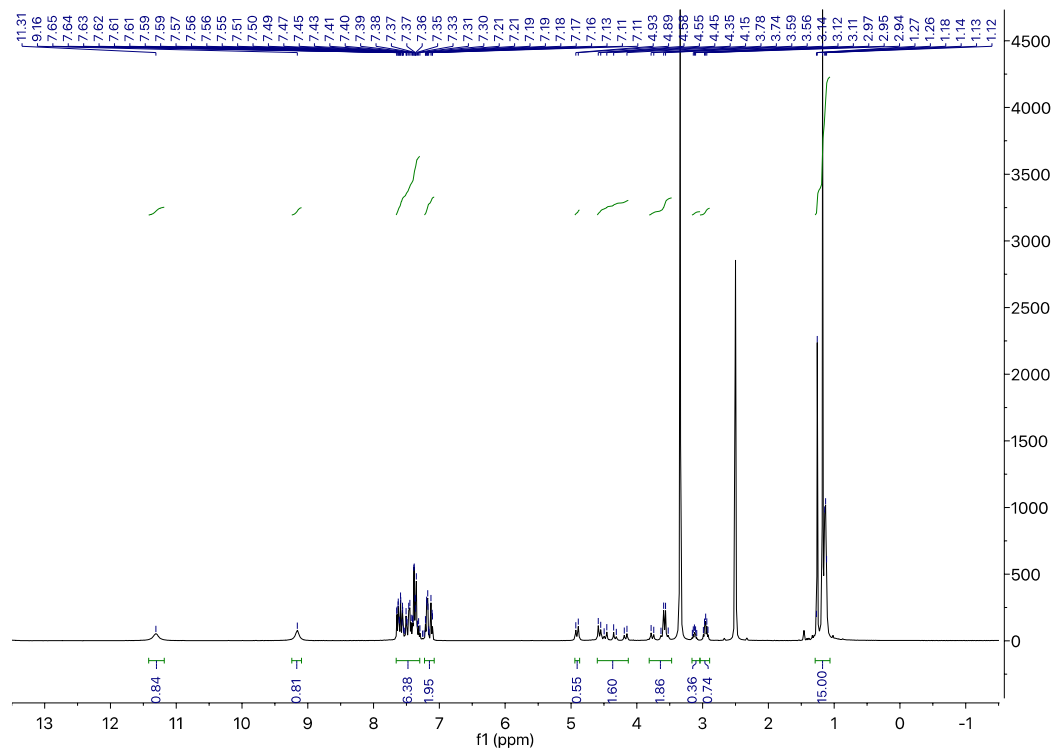

$^{13}\text{C}$  NMR (101 MHz,  $\text{DMSO-}d_6$ )

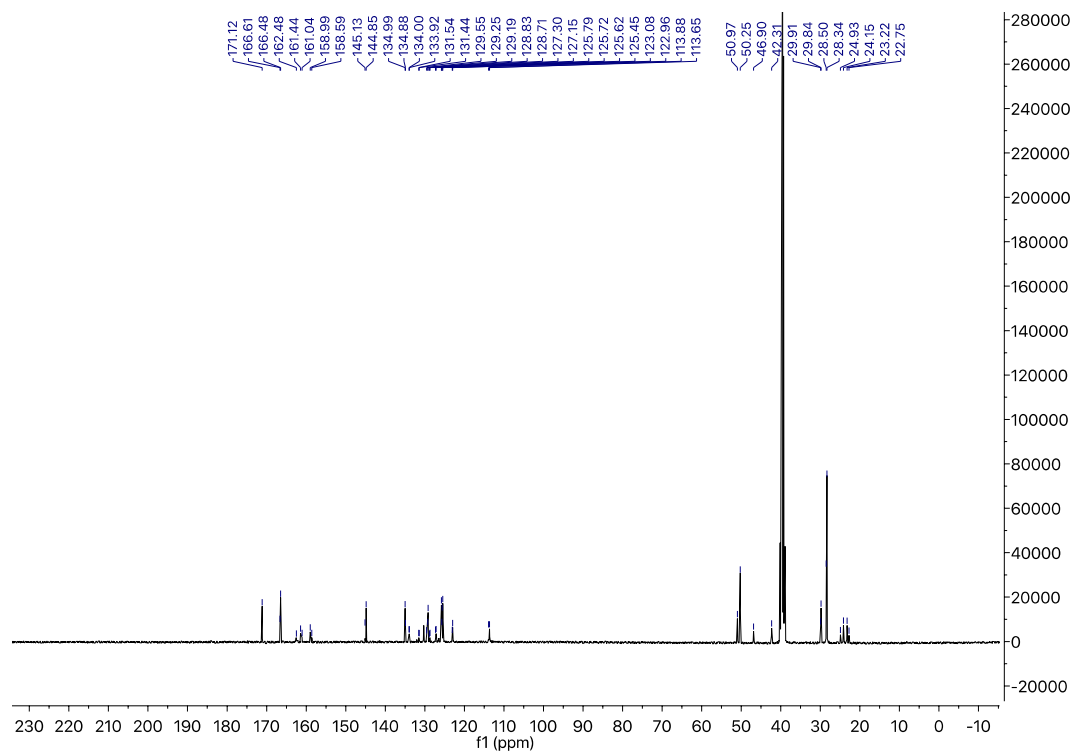

### 3. HPLC chromatograms

4-({*N*-[(cyclohexylcarbamoyl)methyl]-1-(3,5-dimethylphenyl)formamido}methyl)-3-fluoro-*N*-hydroxybenzamide (**10a**)

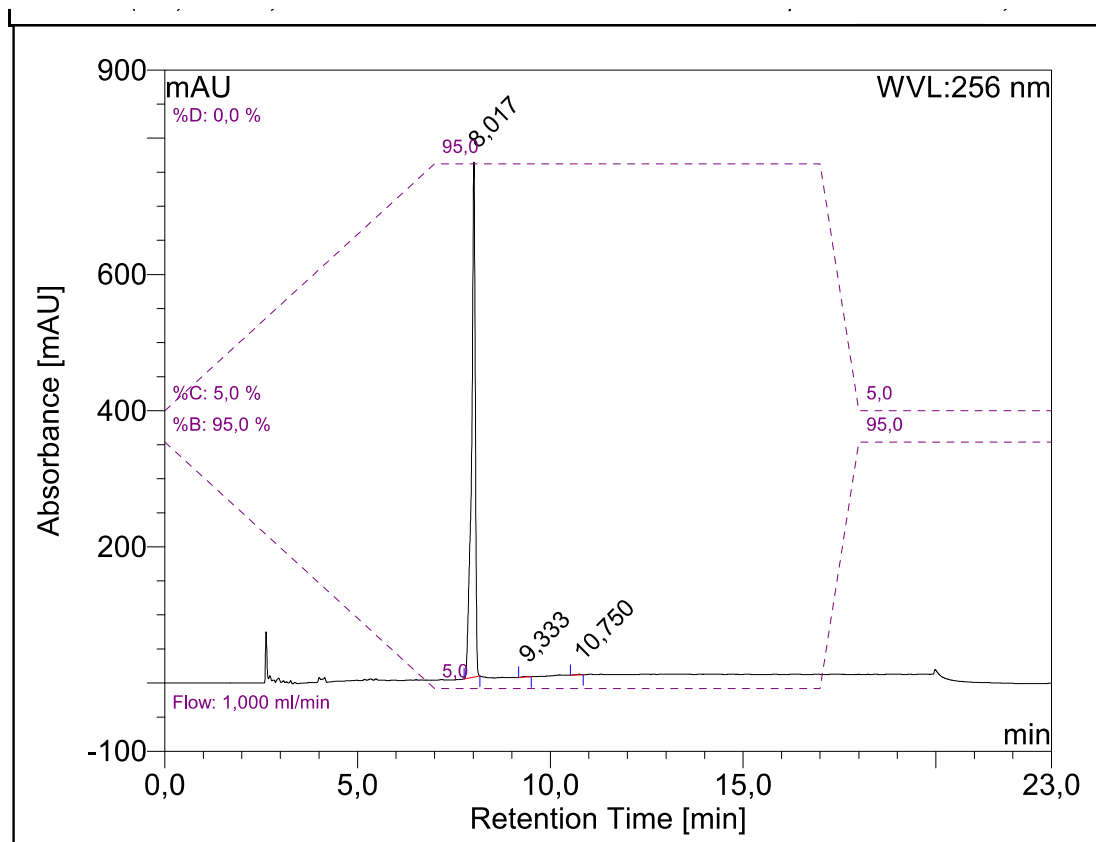

| No.           | Ret.Time<br>min | Peak Name | Height<br>mAU | Area<br>mAU*min | Rel.Area<br>% | Amount | Type |
|---------------|-----------------|-----------|---------------|-----------------|---------------|--------|------|
| 1             | 8,02            | n.a.      | 756,434       | 85,724          | 99,72         | n.a.   | BMB* |
| 2             | 9,33            | n.a.      | 0,876         | 0,111           | 0,13          | n.a.   | BMB* |
| 3             | 10,75           | n.a.      | 0,809         | 0,129           | 0,15          | n.a.   | BMB* |
| <b>Total:</b> |                 |           | 758,119       | 85,964          | 100,00        | 0,000  |      |

4-({*N*-[(cyclohexylcarbamoyl)methyl]-1-[4-(dimethylamino)phenyl]formamido}methyl)-3-fluoro-*N*-hydroxybenzamide (**10b**)

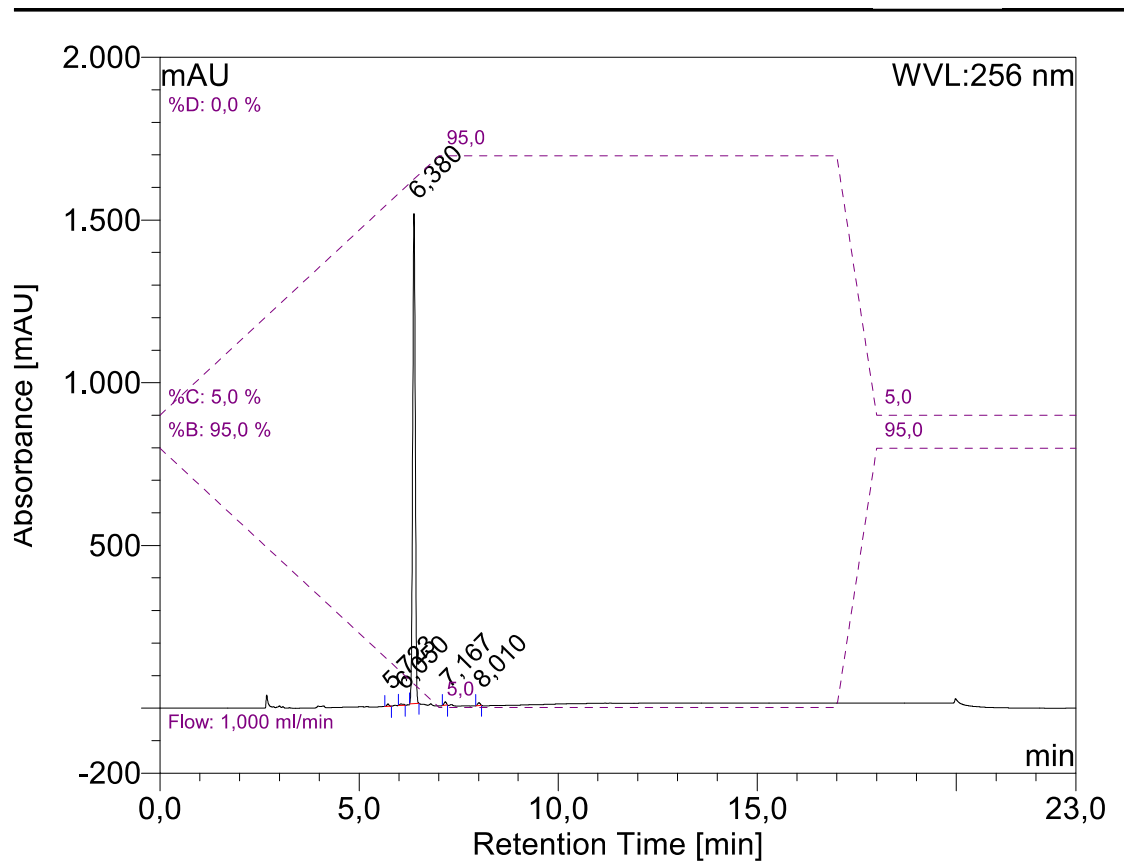

| lo.    | Ret.Time<br>min | Peak Name | Height<br>mAU | Area<br>mAU*min | Rel.Area<br>% | Amount | Type |
|--------|-----------------|-----------|---------------|-----------------|---------------|--------|------|
| 1      | 5,72            | n.a.      | 7,255         | 0,465           | 0,40          | n.a.   | BMB* |
| 2      | 6,05            | n.a.      | 3,878         | 0,429           | 0,37          | n.a.   | BMB* |
| 3      | 6,38            | n.a.      | #####         | 112,630         | 98,08         | n.a.   | BMB* |
| 4      | 7,17            | n.a.      | 10,328        | 0,715           | 0,62          | n.a.   | BMB* |
| 5      | 8,01            | n.a.      | 8,184         | 0,601           | 0,52          | n.a.   | BMB* |
| total: |                 |           | #####         | 114,840         | 100,00        | 0,000  |      |

4-({N-[(cyclohexylcarbamoyl)methyl]-1-(2-fluorophenyl)formamido}methyl)-3-fluoro-N-hydroxybenzamide (**10c**)

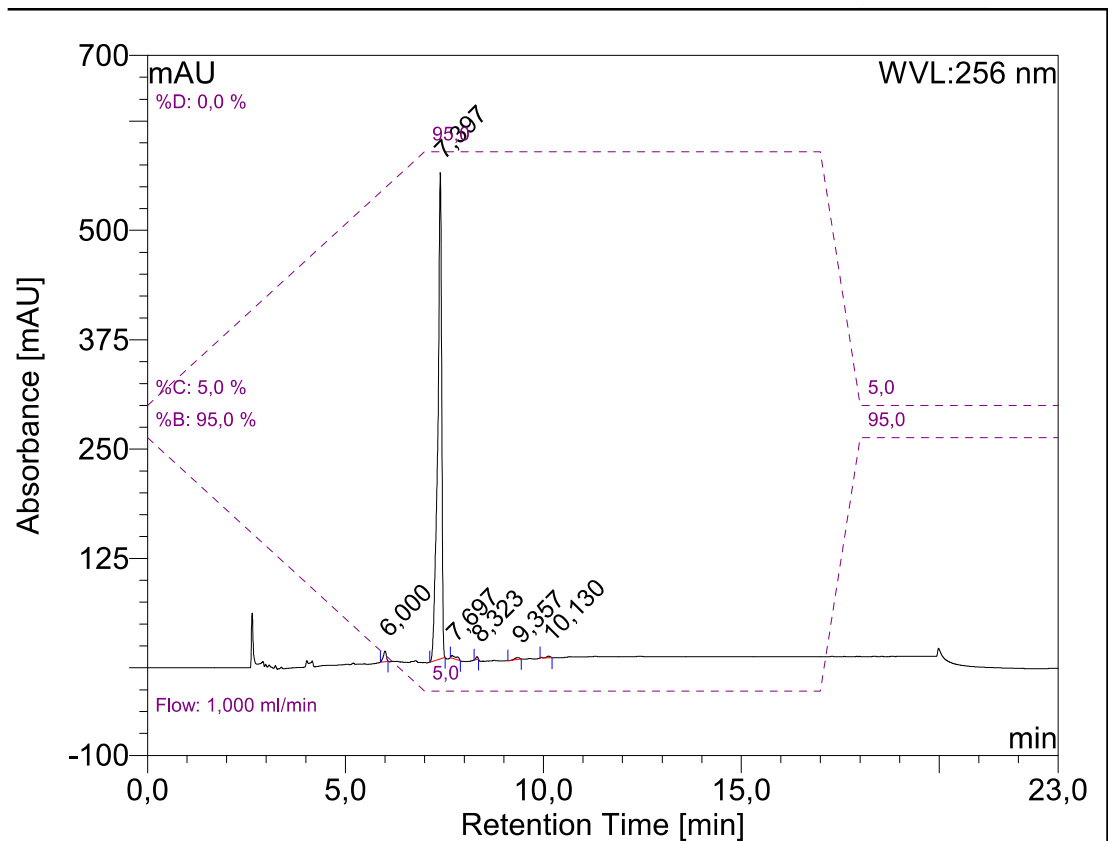

| No.           | Ret.Time<br>min | Peak Name | Height<br>mAU | Area<br>mAU*min | Rel.Area<br>% | Amount | Type |
|---------------|-----------------|-----------|---------------|-----------------|---------------|--------|------|
| 1             | 6,00            | n.a.      | 12,112        | 1,061           | 1,60          | n.a.   | BMB* |
| 2             | 7,40            | n.a.      | 555,713       | 63,989          | 96,62         | n.a.   | BMB* |
| 3             | 7,70            | n.a.      | 2,917         | 0,549           | 0,83          | n.a.   | BMB* |
| 4             | 8,32            | n.a.      | 3,019         | 0,179           | 0,27          | n.a.   | BMB* |
| 5             | 9,36            | n.a.      | 1,951         | 0,274           | 0,41          | n.a.   | BMB* |
| 6             | 10,13           | n.a.      | 1,735         | 0,174           | 0,26          | n.a.   | BMB* |
| <b>total:</b> |                 |           | 577,447       | 66,227          | 100,00        | 0,000  |      |

4-({*N*-[(cyclohexylcarbamoyl)methyl]-1-(2-methylphenyl)formamido}methyl)-3-fluoro-*N*-hydroxybenzamide (**10d**)

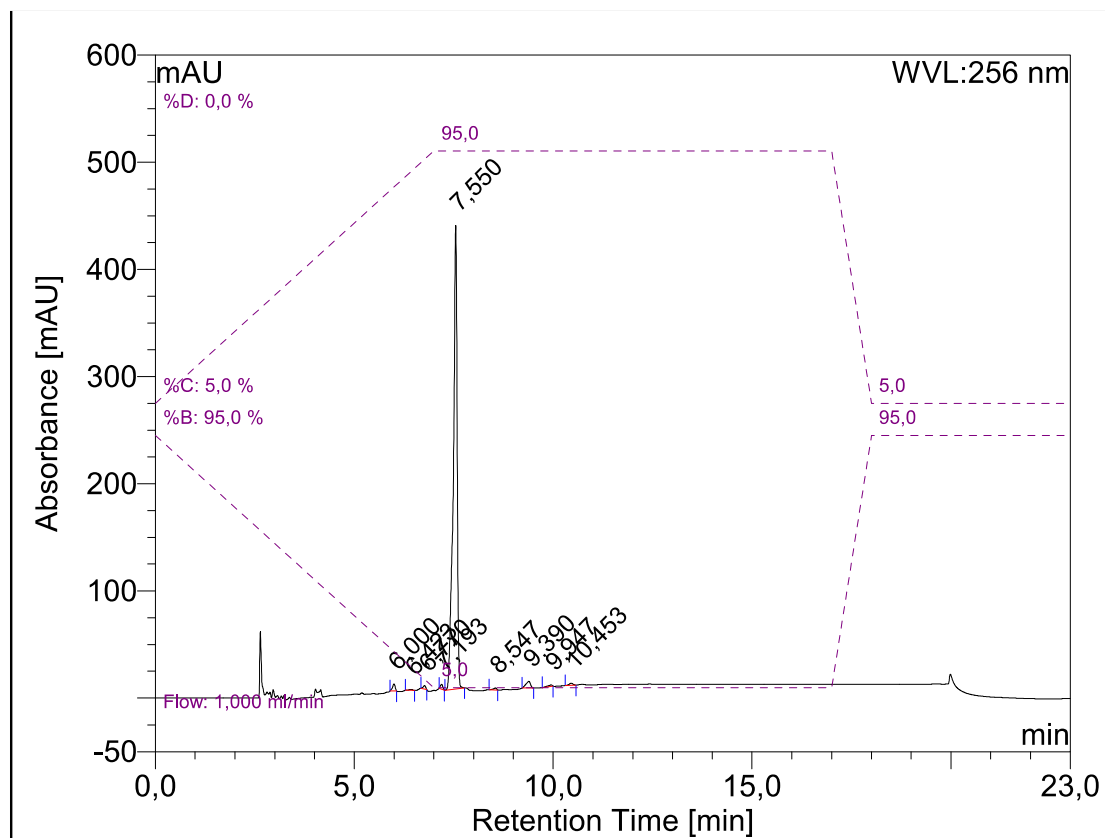

| No.           | Ret.Time<br>min | Peak Name | Height<br>mAU | Area<br>mAU*min | Rel.Area<br>% | Amount | Type |
|---------------|-----------------|-----------|---------------|-----------------|---------------|--------|------|
| 1             | 6,00            | n.a.      | 6,453         | 0,499           | 0,97          | n.a.   | BMB* |
| 2             | 6,42            | n.a.      | 1,006         | 0,092           | 0,18          | n.a.   | BMB* |
| 3             | 6,77            | n.a.      | 3,072         | 0,219           | 0,43          | n.a.   | BMB* |
| 4             | 7,19            | n.a.      | 4,475         | 0,315           | 0,61          | n.a.   | BMB* |
| 5             | 7,55            | n.a.      | 432,672       | 48,955          | 95,07         | n.a.   | BMB* |
| 6             | 8,55            | n.a.      | 1,904         | 0,182           | 0,35          | n.a.   | BMB* |
| 7             | 9,39            | n.a.      | 6,247         | 0,833           | 1,62          | n.a.   | BMB* |
| 8             | 9,95            | n.a.      | 1,513         | 0,179           | 0,35          | n.a.   | BMB* |
| 9             | 10,45           | n.a.      | 1,954         | 0,221           | 0,43          | n.a.   | BMB* |
| <b>Total:</b> |                 |           | 459,297       | 51,496          | 100,00        | 0,000  |      |



4-({N-[(cyclohexylcarbonyl)methyl]-1-(2-methoxyphenyl)formamido }methyl)-3-fluoro-N-hydroxybenzamide (**10e**)

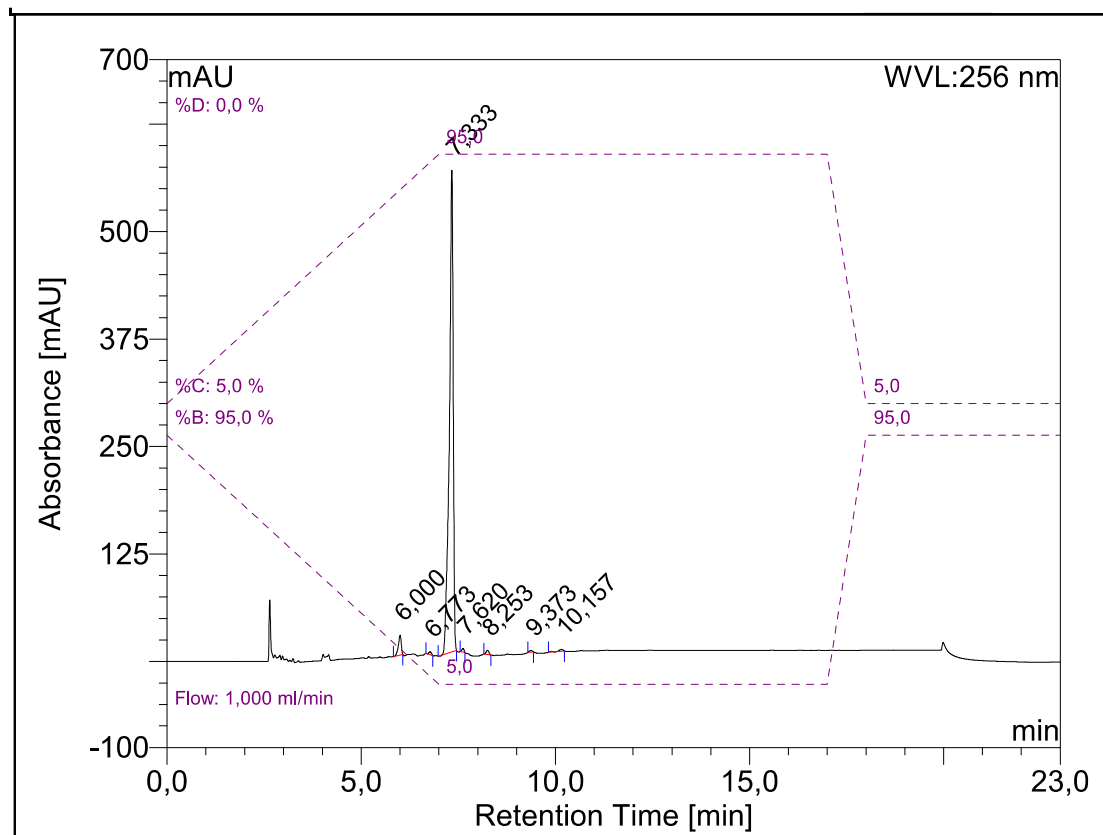

| No.           | Ret.Time<br>min | Peak Name | Height<br>mAU | Area<br>mAU*min | Rel.Area<br>% | Amount | Type |
|---------------|-----------------|-----------|---------------|-----------------|---------------|--------|------|
| 1             | 6,00            | n.a.      | 23,227        | 1,979           | 2,92          | n.a.   | BMB* |
| 2             | 6,77            | n.a.      | 3,518         | 0,266           | 0,39          | n.a.   | BMB* |
| 3             | 7,33            | n.a.      | 560,359       | 64,409          | 95,06         | n.a.   | BMB* |
| 4             | 7,62            | n.a.      | 4,018         | 0,261           | 0,38          | n.a.   | BMB* |
| 5             | 8,25            | n.a.      | 4,892         | 0,399           | 0,59          | n.a.   | BMB* |
| 6             | 9,37            | n.a.      | 1,859         | 0,160           | 0,24          | n.a.   | BMB* |
| 7             | 10,16           | n.a.      | 2,135         | 0,283           | 0,42          | n.a.   | BMB* |
| <b>Total:</b> |                 |           | 600,009       | 67,756          | 100,00        | 0,000  |      |

4-({*N*-[(cyclohexylcarbamoyl)methyl]-1-[2-(trifluoromethyl)phenyl]formamido }methyl)-3-fluoro-*N*-hydroxybenzamide (**10f**)

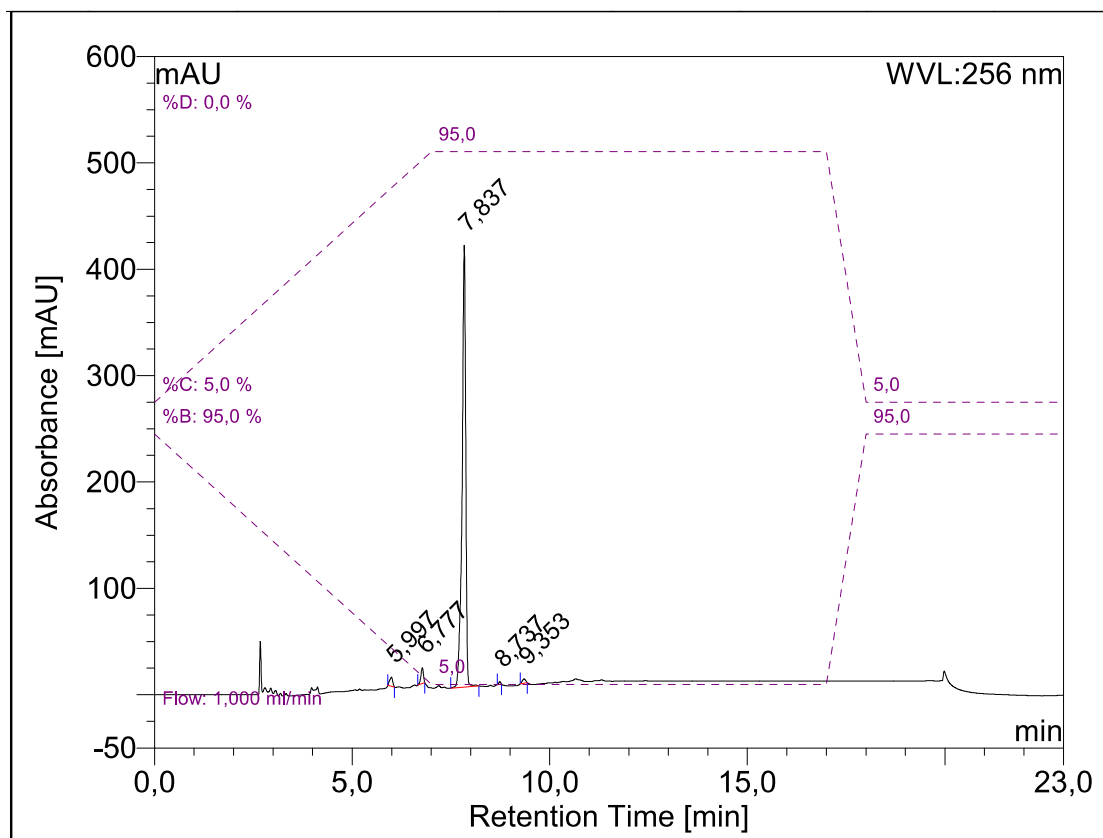

| No.           | Ret.Time<br>min | Peak Name | Height<br>mAU | Area<br>mAU*min | Rel.Area<br>% | Amount | Type |
|---------------|-----------------|-----------|---------------|-----------------|---------------|--------|------|
| 1             | 6,00            | n.a.      | 8,523         | 0,769           | 1,62          | n.a.   | BMB* |
| 2             | 6,78            | n.a.      | 14,812        | 1,071           | 2,26          | n.a.   | BMB* |
| 3             | 7,84            | n.a.      | 415,314       | 45,086          | 95,02         | n.a.   | BMB* |
| 4             | 8,74            | n.a.      | 2,456         | 0,139           | 0,29          | n.a.   | BMB* |
| 5             | 9,35            | n.a.      | 3,914         | 0,386           | 0,81          | n.a.   | BMB* |
| <b>Total:</b> |                 |           | 445,018       | 47,450          | 100,00        | 0,000  |      |

4-({N-[(benzylcarbamoyl)methyl]-1-(3,5-dimethylphenyl)formamido}methyl)-3-fluoro-N-hydroxybenzamide (**10g**)

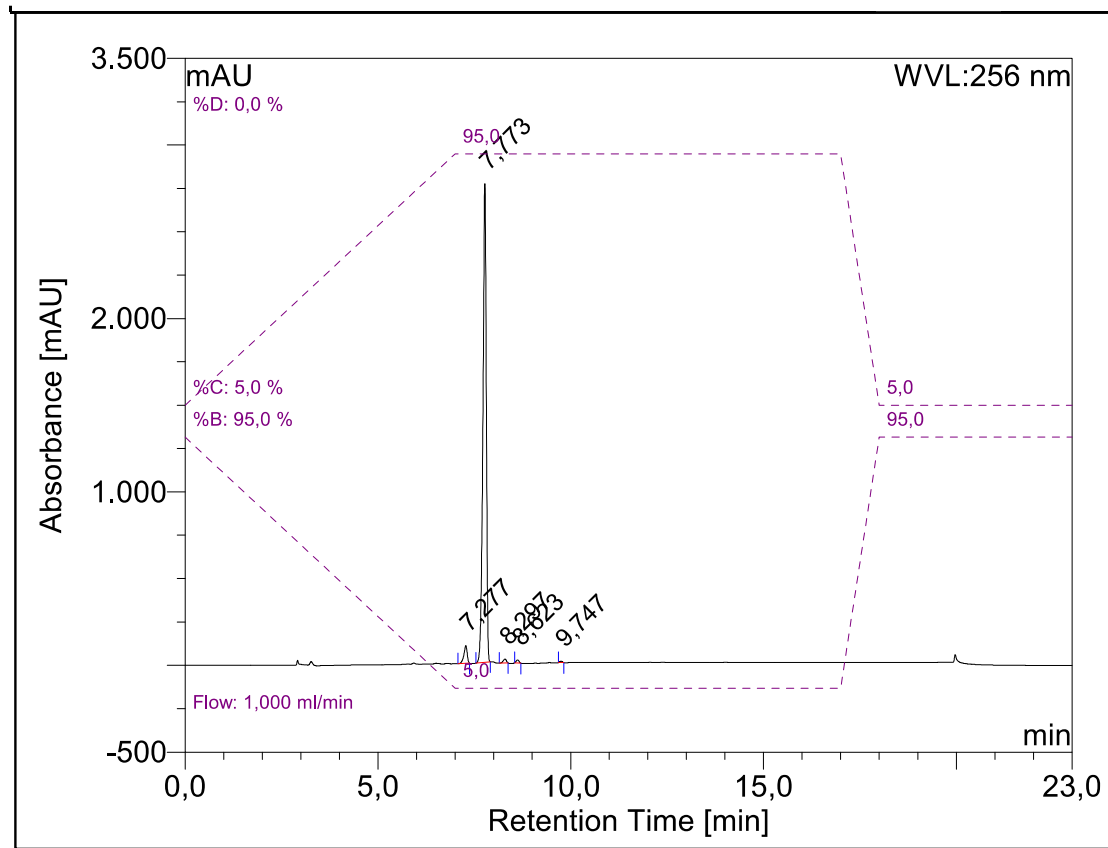

| No.           | Ret.Time<br>min | Peak Name | Height<br>mAU | Area<br>mAU*min | Rel.Area<br>% | Amount | Type |
|---------------|-----------------|-----------|---------------|-----------------|---------------|--------|------|
| 1             | 7,28            | n.a.      | 102,138       | 10,225          | 3,43          | n.a.   | BMB* |
| 2             | 7,77            | n.a.      | #####         | 283,953         | 95,18         | n.a.   | BMB* |
| 3             | 8,30            | n.a.      | 22,152        | 2,064           | 0,69          | n.a.   | BMB* |
| 4             | 8,62            | n.a.      | 17,619        | 1,463           | 0,49          | n.a.   | BMB* |
| 5             | 9,75            | n.a.      | 8,046         | 0,627           | 0,21          | n.a.   | BMB* |
| <b>Total:</b> |                 |           | #####         | 298,333         | 100,00        | 0,000  |      |

4-({N-[(benzylcarbamoyl)methyl]-1-[4-(dimethylamino)phenyl]formamido}methyl)-3-fluoro-N-hydroxybenzamide (**10h**)

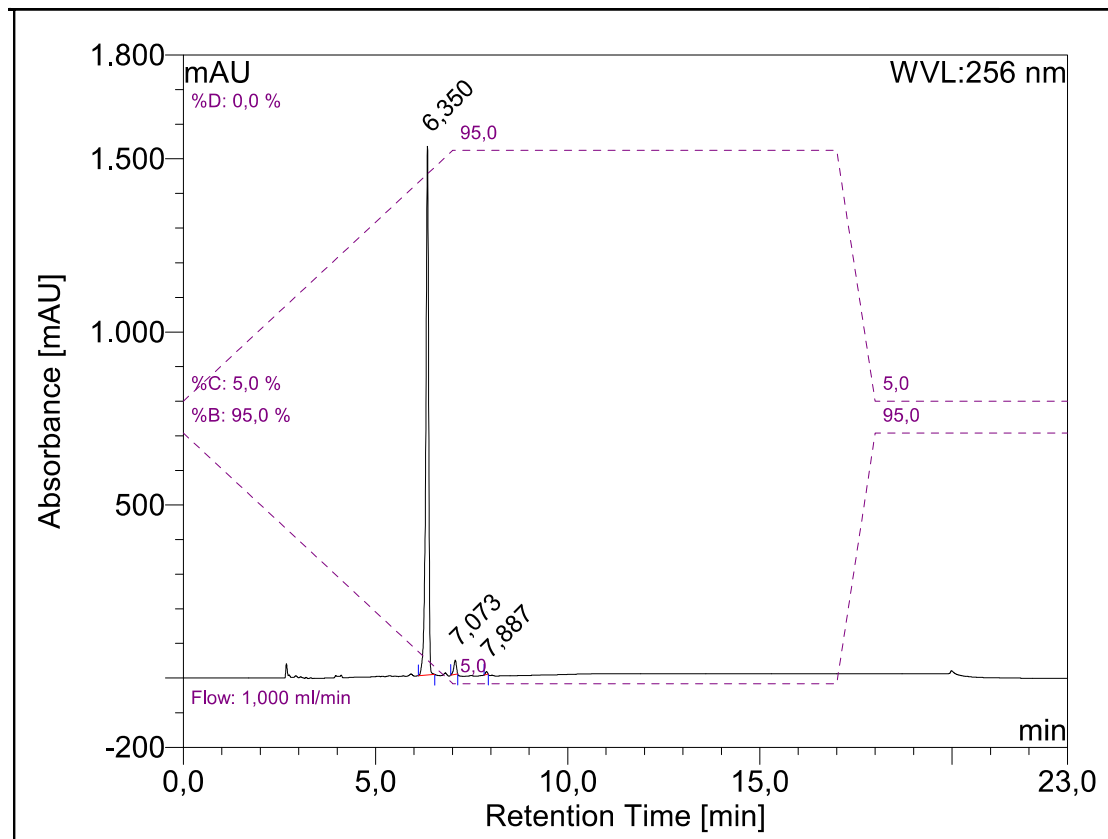

| No.           | Ret.Time<br>min | Peak Name | Height<br>mAU | Area<br>mAU*min | Rel.Area<br>% | Amount | Type |
|---------------|-----------------|-----------|---------------|-----------------|---------------|--------|------|
| 1             | 6,35            | n.a.      | #####         | 130,046         | 97,24         | n.a.   | BMB* |
| 2             | 7,07            | n.a.      | 41,580        | 3,199           | 2,39          | n.a.   | BMB* |
| 3             | 7,89            | n.a.      | 8,265         | 0,498           | 0,37          | n.a.   | BMB* |
| <b>Total:</b> |                 |           | #####         | 133,743         | 100,00        | 0,000  |      |

4-({N-[(*tert*-butylcarbamoyl)methyl]-1-(3,5-dimethylphenyl)formamido}methyl)-3-fluoro-*N*-hydroxybenzamide (**10i**)

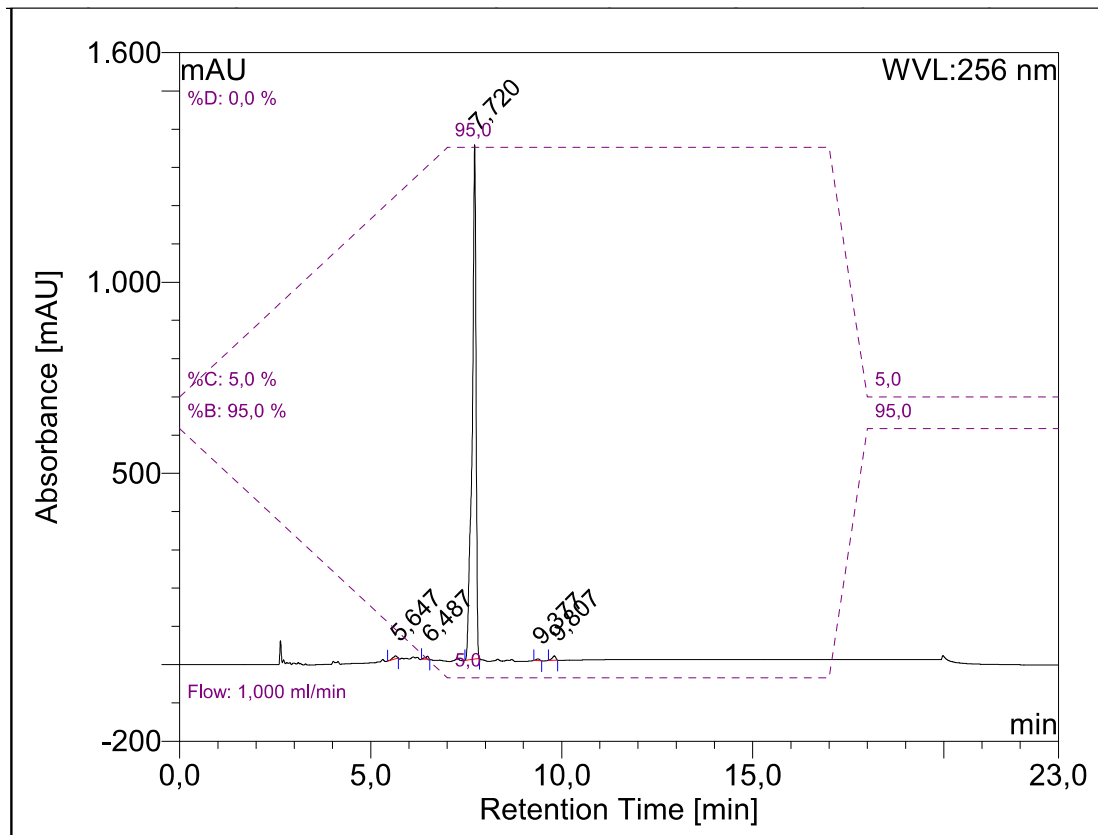

| No.           | Ret.Time<br>min | Peak Name | Height<br>mAU | Area<br>mAU*min | Rel.Area<br>% | Amount | Type |
|---------------|-----------------|-----------|---------------|-----------------|---------------|--------|------|
| 1             | 5,65            | n.a.      | 7,964         | 0,909           | 0,56          | n.a.   | BMB* |
| 2             | 6,49            | n.a.      | 8,031         | 0,837           | 0,51          | n.a.   | BMB* |
| 3             | 7,72            | n.a.      | #####         | 160,040         | 97,86         | n.a.   | BMB* |
| 4             | 9,38            | n.a.      | 4,857         | 0,512           | 0,31          | n.a.   | BMB* |
| 5             | 9,81            | n.a.      | 11,349        | 1,236           | 0,76          | n.a.   | BMB* |
| <b>Total:</b> |                 |           | #####         | 163,534         | 100,00        | 0,000  |      |

4-({N-[(*tert*-butylcarbamoyl)methyl]-1-[4-(dimethylamino)phenyl]formamido }methyl)-3-fluoro-*N*-hydroxybenzamide (**10j**)

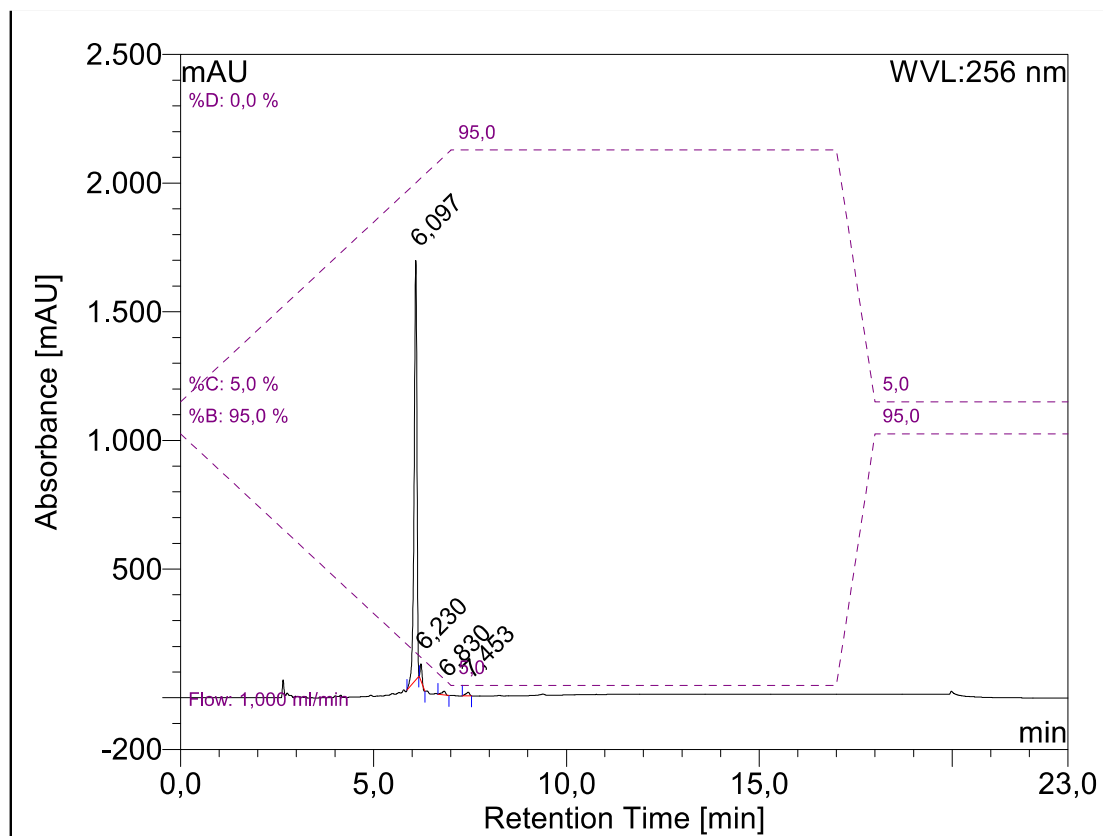

| No.           | Ret.Time<br>min | Peak Name | Height<br>mAU | Area<br>mAU*min | Rel.Area<br>% | Amount | Type |
|---------------|-----------------|-----------|---------------|-----------------|---------------|--------|------|
| 1             | 6,10            | n.a.      | #####         | 139,570         | 95,46         | n.a.   | BMB* |
| 2             | 6,23            | n.a.      | 65,683        | 3,326           | 2,27          | n.a.   | BMB* |
| 3             | 6,83            | n.a.      | 15,276        | 1,673           | 1,14          | n.a.   | BMB* |
| 4             | 7,45            | n.a.      | 14,745        | 1,638           | 1,12          | n.a.   | BMB* |
| <b>Total:</b> |                 |           | #####         | 146,206         | 100,00        | 0,000  |      |

4-({N-[(*tert*-butylcarbamoyl)methyl]-1-(2-fluorophenyl)formamido}methyl)-3-fluoro-*N*-hydroxybenzamide (**10k**)

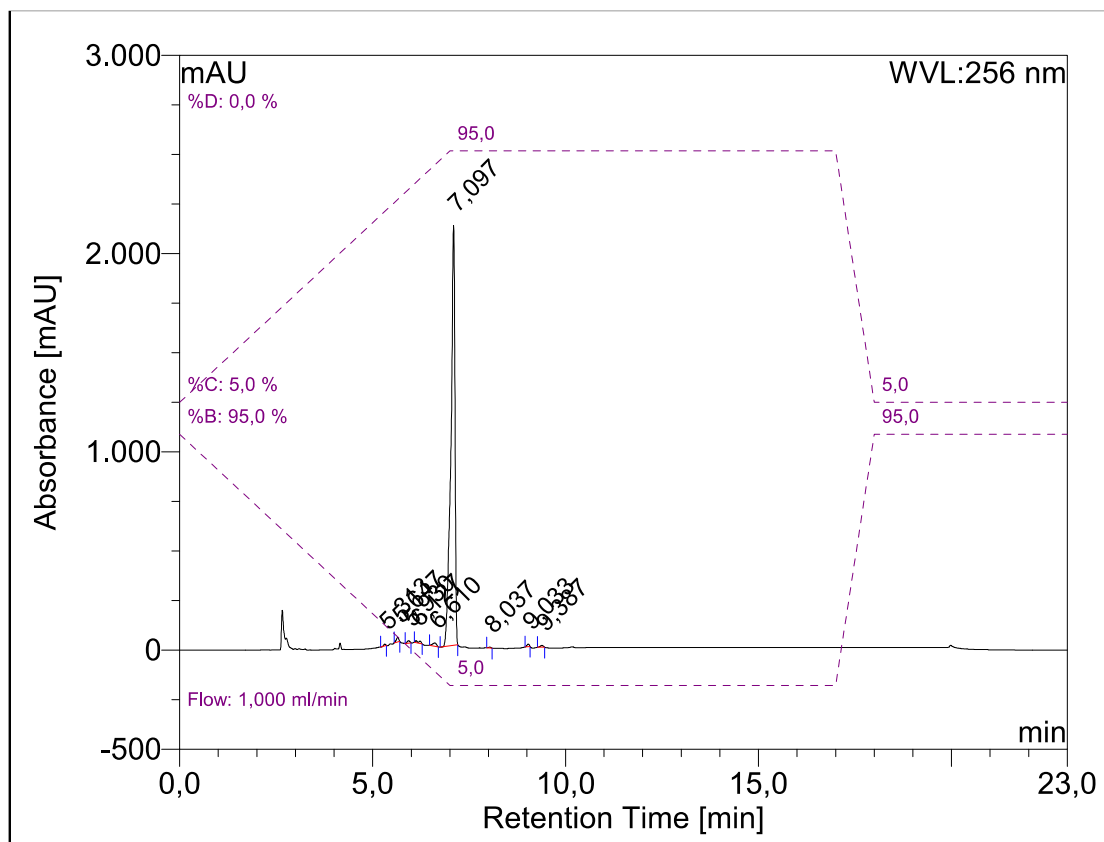

| No.           | Ret.Time<br>min | Peak Name | Height<br>mAU | Area<br>mAU*min | Rel.Area<br>% | Amount | Type |
|---------------|-----------------|-----------|---------------|-----------------|---------------|--------|------|
| 1             | 5,31            | n.a.      | 9,767         | 0,547           | 0,20          | n.a.   | BMB* |
| 2             | 5,65            | n.a.      | 23,662        | 1,717           | 0,64          | n.a.   | BMB* |
| 3             | 5,93            | n.a.      | 11,607        | 0,910           | 0,34          | n.a.   | BMB* |
| 4             | 6,13            | n.a.      | 10,134        | 1,356           | 0,51          | n.a.   | BMB* |
| 5             | 6,61            | n.a.      | 16,290        | 1,993           | 0,75          | n.a.   | BMB* |
| 6             | 7,10            | n.a.      | #####         | 258,534         | 96,76         | n.a.   | BMB* |
| 7             | 8,04            | n.a.      | 4,209         | 0,290           | 0,11          | n.a.   | BMB* |
| 8             | 9,03            | n.a.      | 13,369        | 0,940           | 0,35          | n.a.   | BMB* |
| 9             | 9,39            | n.a.      | 9,563         | 0,916           | 0,34          | n.a.   | BMB* |
| <b>Total:</b> |                 |           | #####         | 267,203         | 100,00        | 0,000  |      |

4-({N-[(*tert*-butylcarbamoyl)methyl]-1-(2-methylphenyl)formamido}methyl)-3-fluoro-*N*-hydroxybenzamide (**10l**)

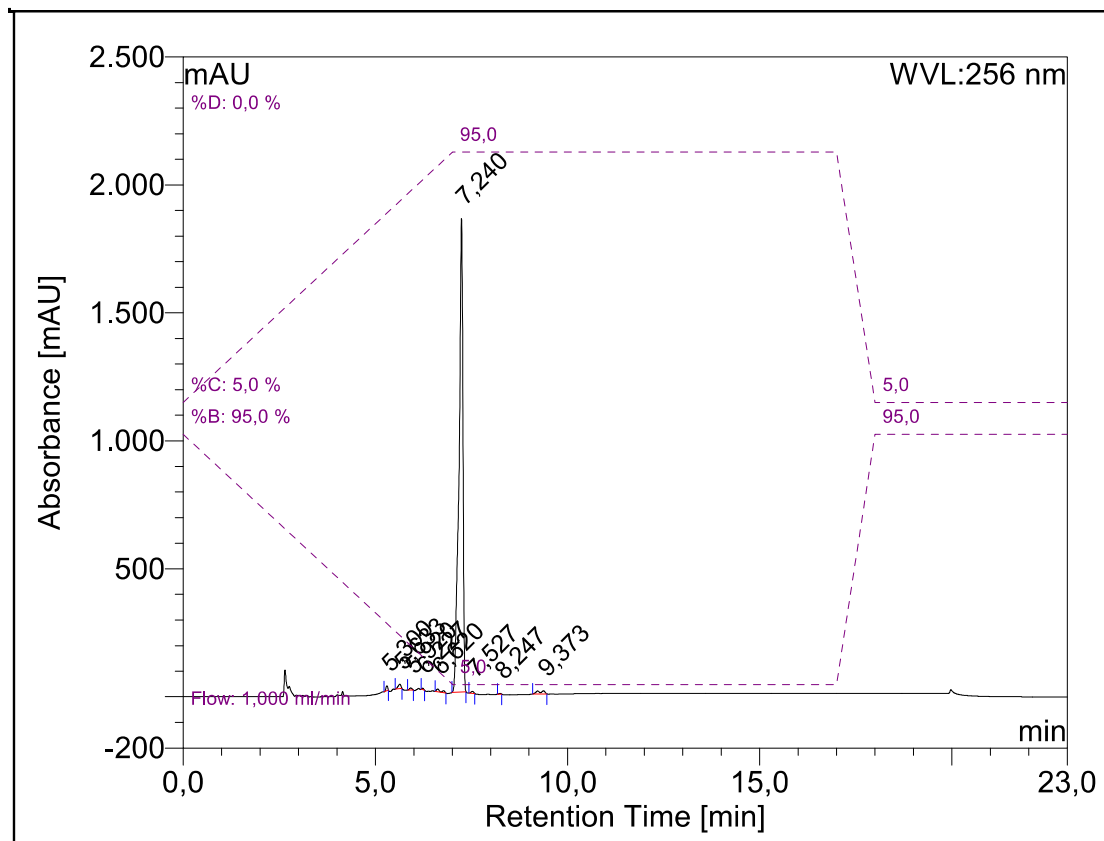

| No.           | Ret.Time<br>min | Peak Name | Height<br>mAU | Area<br>mAU*min | Rel.Area<br>% | Amount | Type |
|---------------|-----------------|-----------|---------------|-----------------|---------------|--------|------|
| 1             | 5,30            | n.a.      | 18,691        | 1,042           | 0,46          | n.a.   | BMB* |
| 2             | 5,63            | n.a.      | 17,920        | 1,567           | 0,69          | n.a.   | BMB* |
| 3             | 5,92            | n.a.      | 8,234         | 0,620           | 0,27          | n.a.   | BMB* |
| 4             | 6,23            | n.a.      | 5,203         | 0,271           | 0,12          | n.a.   | BMB* |
| 5             | 6,62            | n.a.      | 10,859        | 1,451           | 0,64          | n.a.   | BMB* |
| 6             | 7,24            | n.a.      | #####         | 217,882         | 96,43         | n.a.   | BMB* |
| 7             | 7,53            | n.a.      | 7,259         | 0,554           | 0,25          | n.a.   | BMB* |
| 8             | 8,25            | n.a.      | 2,951         | 0,173           | 0,08          | n.a.   | BMB* |
| 9             | 9,37            | n.a.      | 11,601        | 2,400           | 1,06          | n.a.   | BMB* |
| <b>Total:</b> |                 |           | #####         | 225,960         | 100,00        | 0,000  |      |



4-({N-[(*tert*-butylcarbamoyl)methyl]-1-(2-methoxyphenyl)formamido}methyl)-3-fluoro-*N*-hydroxybenzamide (**10m**)

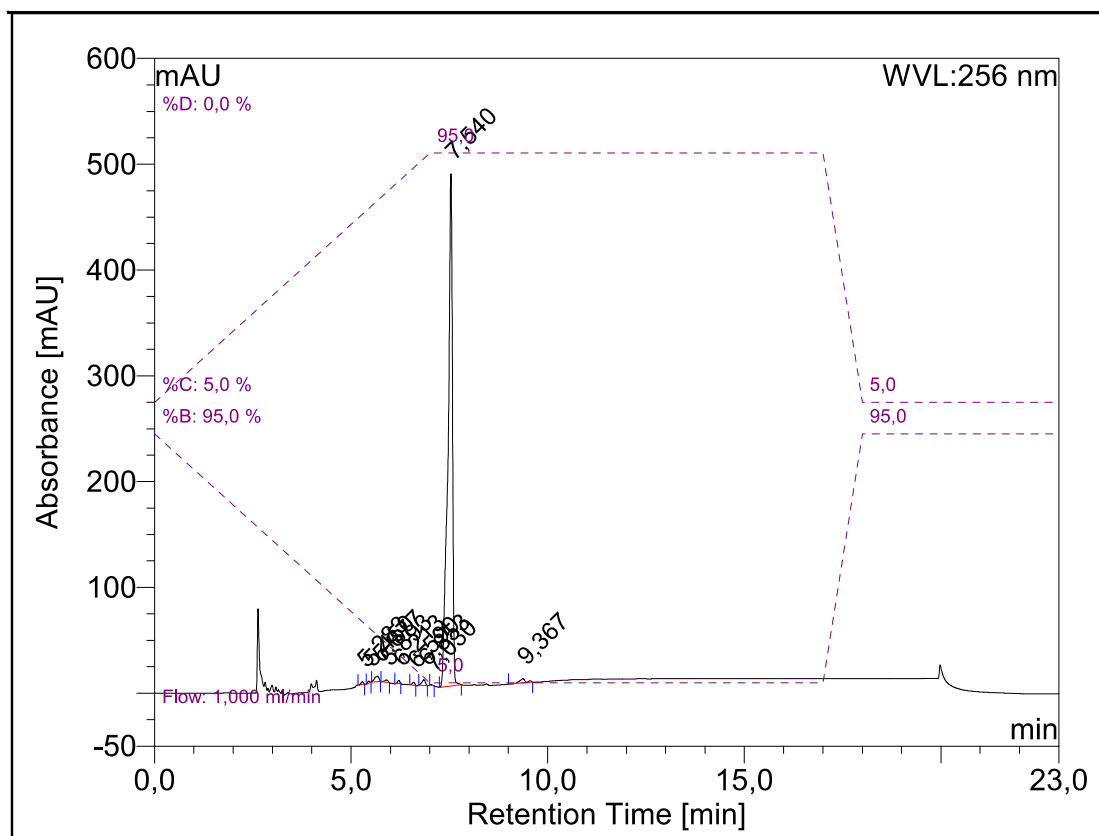

| No.           | Ret.Time<br>min | Peak Name | Height<br>mAU | Area<br>mAU*min | Rel.Area<br>% | Amount | Type |
|---------------|-----------------|-----------|---------------|-----------------|---------------|--------|------|
| 1             | 5,28            | n.a.      | 2,730         | 0,183           | 0,27          | n.a.   | BMB* |
| 2             | 5,45            | n.a.      | 2,231         | 0,138           | 0,21          | n.a.   | BMB* |
| 3             | 5,68            | n.a.      | 5,251         | 0,652           | 0,98          | n.a.   | BMB* |
| 4             | 5,89            | n.a.      | 2,239         | 0,245           | 0,37          | n.a.   | BMB* |
| 5             | 6,21            | n.a.      | 2,849         | 0,188           | 0,28          | n.a.   | BMB* |
| 6             | 6,59            | n.a.      | 2,842         | 0,205           | 0,31          | n.a.   | BMB* |
| 7             | 6,85            | n.a.      | 5,421         | 0,543           | 0,81          | n.a.   | BMB* |
| 8             | 7,03            | n.a.      | 0,593         | 0,049           | 0,07          | n.a.   | BMB* |
| 9             | 7,54            | n.a.      | 484,106       | 63,662          | 95,59         | n.a.   | BMB* |
| 10            | 9,37            | n.a.      | 4,085         | 0,731           | 1,10          | n.a.   | BMB* |
| <b>Total:</b> |                 |           | 512,347       | 66,596          | 100,00        | 0,000  |      |

4-({*N*-[(*tert*-butylcarbamoyl)methyl]-1-[2-(trifluoromethyl)phenyl]formamido}methyl)-3-fluoro-*N*-hydroxybenzamide (**10n**)

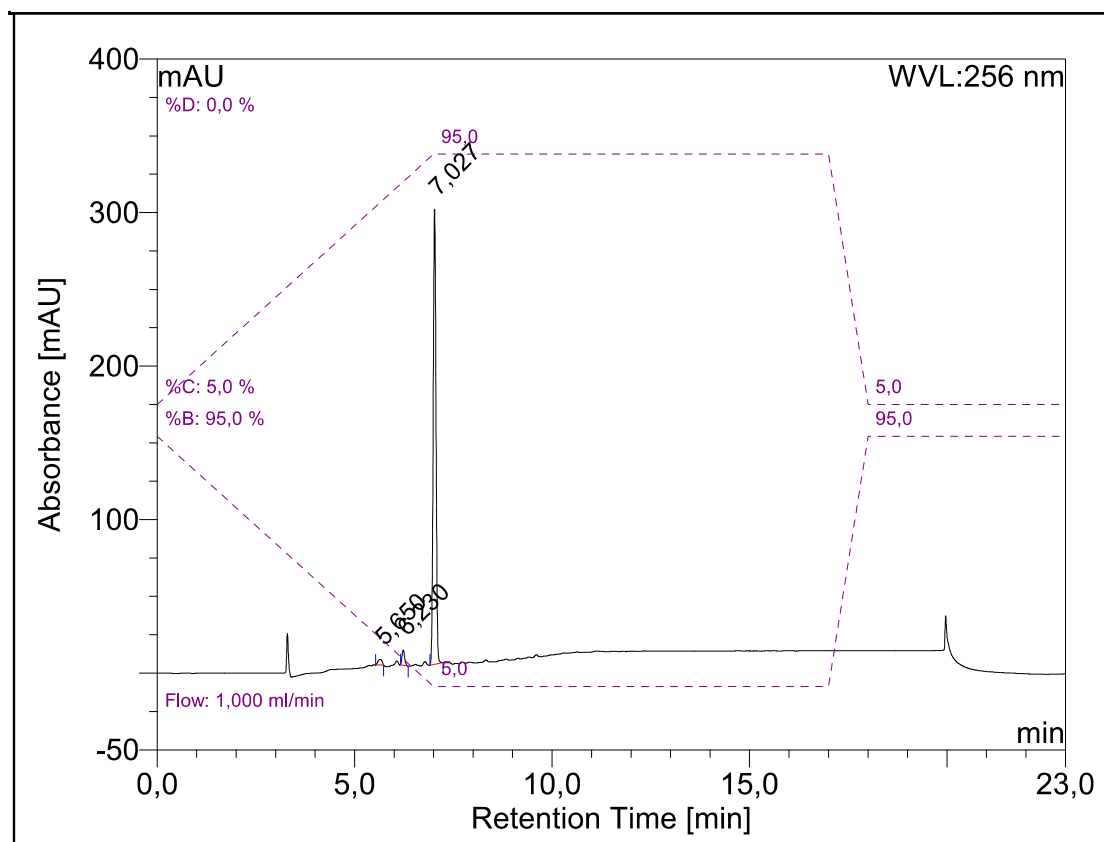

| No.           | Ret.Time<br>min | Peak Name | Height<br>mAU | Area<br>mAU*min | Rel.Area<br>% | Amount | Type |
|---------------|-----------------|-----------|---------------|-----------------|---------------|--------|------|
| 1             | 5,65            | n.a.      | 3,712         | 0,450           | 1,76          | n.a.   | BMB* |
| 2             | 6,23            | n.a.      | 10,095        | 0,799           | 3,13          | n.a.   | BMB* |
| 3             | 7,03            | n.a.      | 296,196       | 24,261          | 95,10         | n.a.   | BMB* |
| <b>Total:</b> |                 |           | 310,003       | 25,510          | 100,00        | 0,000  |      |

4-({N-[(*tert*-butylcarbamoyl)methyl]-1-(2-chlorophenyl)formamido}methyl)-3-fluoro-*N*-hydroxybenzamide (**10o**)

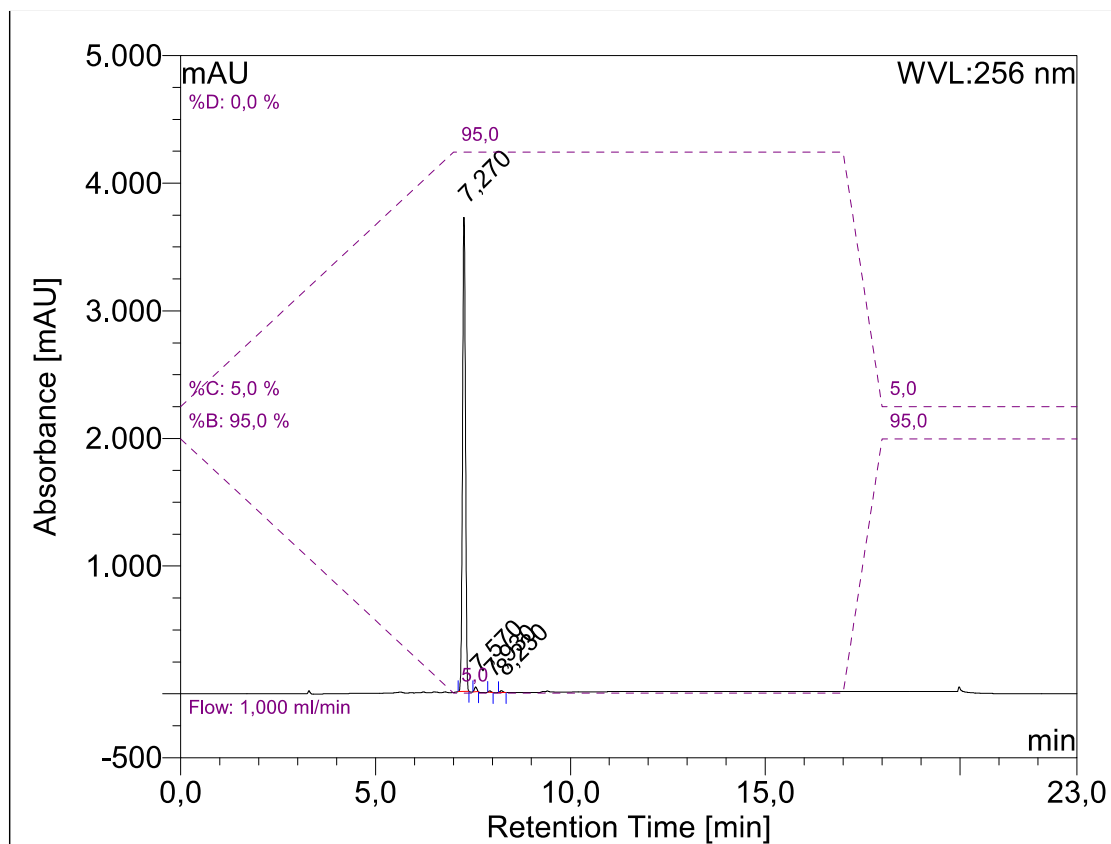

| No.           | Ret.Time<br>min | Peak Name | Height<br>mAU | Area<br>mAU*min | Rel.Area<br>% | Amount | Type |
|---------------|-----------------|-----------|---------------|-----------------|---------------|--------|------|
| 1             | 7,27            | n.a.      | #####         | 322,378         | 98,56         | n.a.   | BMB* |
| 2             | 7,57            | n.a.      | 37,183        | 2,726           | 0,83          | n.a.   | BMB* |
| 3             | 7,93            | n.a.      | 10,692        | 0,753           | 0,23          | n.a.   | BMB* |
| 4             | 8,23            | n.a.      | 15,348        | 1,228           | 0,38          | n.a.   | BMB* |
| <b>Total:</b> |                 |           | #####         | 327,085         | 100,00        | 0,000  |      |

4-({N-[(*tert*-butylcarbamoyl)methyl]-1-[2-(propan-2-yl)phenyl]formamido }methyl)-3-fluoro-*N*-hydroxybenzamide (**10p**)

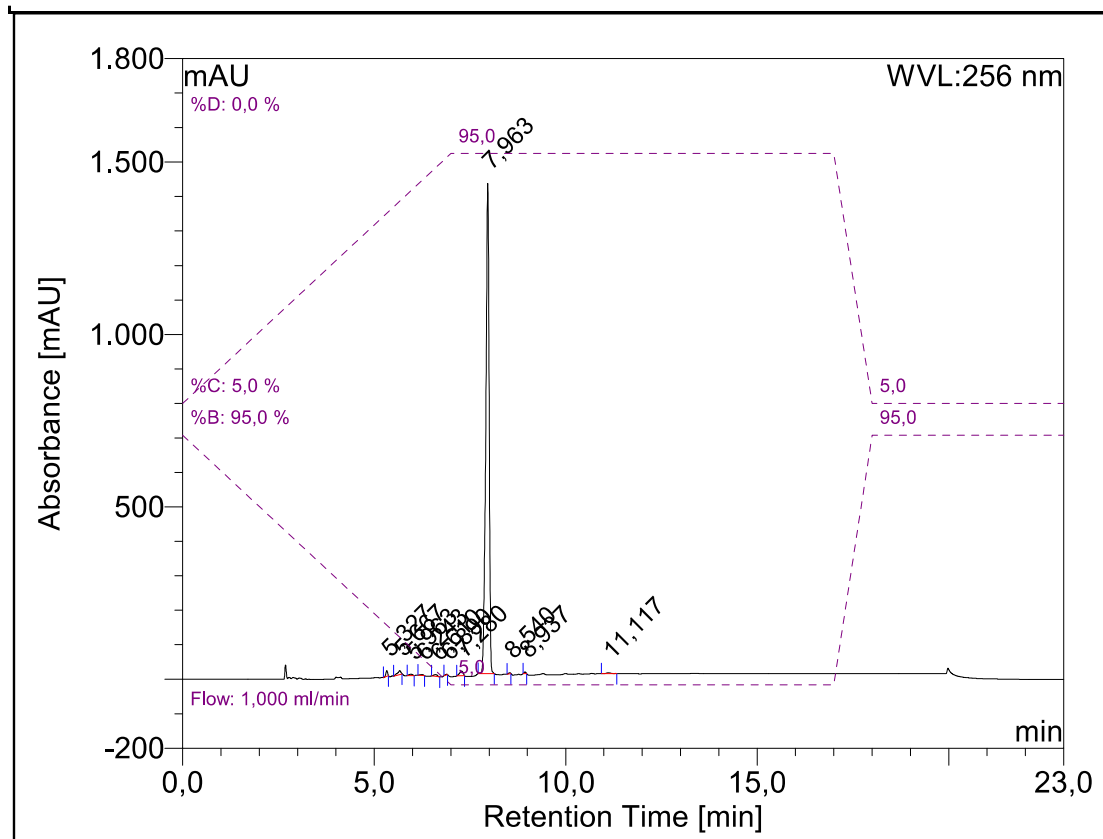

| No.           | Ret.Time<br>min | Peak Name | Height<br>mAU | Area<br>mAU*min | Rel.Area<br>% | Amount | Type |
|---------------|-----------------|-----------|---------------|-----------------|---------------|--------|------|
| 1             | 5,33            | n.a.      | 15,654        | 0,815           | 0,55          | n.a.   | BMB* |
| 2             | 5,67            | n.a.      | 11,328        | 1,118           | 0,76          | n.a.   | BMB* |
| 3             | 5,96            | n.a.      | 3,677         | 0,360           | 0,24          | n.a.   | BMB* |
| 4             | 6,24            | n.a.      | 2,570         | 0,219           | 0,15          | n.a.   | BMB* |
| 5             | 6,61            | n.a.      | 4,983         | 0,534           | 0,36          | n.a.   | BMB* |
| 6             | 6,89            | n.a.      | 1,790         | 0,104           | 0,07          | n.a.   | BMB* |
| 7             | 7,28            | n.a.      | 13,440        | 1,412           | 0,96          | n.a.   | BMB* |
| 8             | 7,96            | n.a.      | #####         | 141,929         | 96,35         | n.a.   | BMB* |
| 9             | 8,54            | n.a.      | 3,457         | 0,202           | 0,14          | n.a.   | BMB* |
| 10            | 8,94            | n.a.      | 4,819         | 0,272           | 0,18          | n.a.   | BMB* |
| 11            | 11,12           | n.a.      | 2,353         | 0,338           | 0,23          | n.a.   | BMB* |
| <b>Total:</b> |                 |           | #####         | 147,303         | 100,00        | 0,000  |      |
